# Supplementary material for: Structural, linear, and nonlinear optical properties of ortho-carboranyl luminophores: insights from DFT and TD-DFT studies
Source: Royal Society of Chemistry journal article supplement (doi:10.1039/d6ra00681g), 2026-04-22
Supplement: d6ra00681g1.pdf [file d6ra00681g1.pdf]

## Structural, Linear, and Nonlinear Optical Properties of ortho-Carboranyl Luminophores: Insights from DFT and TD-DFT Studies

*Djamila Samsar,<sup>1,2</sup> Douniazed Hannachi,<sup>3,4</sup> Meriem Zaidi,<sup>4,5</sup> Guillaume Hoffmann,<sup>6</sup> Olivier Aroule,<sup>6</sup> Henry Chermette<sup>6</sup>*

<sup>1</sup> Institut D'Hygiène et Sécurité Industrielle, Département de Socle commun Hygiène et Sécurité Industrielle, Université de Batna-2, Algérie

<sup>2</sup> Department of Chemistry, Faculty of Matter Sciences, Laboratory of Materials Chemistry and the Living: Activity & Reactivity (LCMVAR), University of Batna-1, Algeria

<sup>3</sup> Laboratoire d'Électrochimie, d'Ingénierie Moléculaire et de Catalyse Redox (LEIMCR), Faculté de Technologie, Université Ferhat Abbas, Sétif-1, Algérie.

<sup>4</sup> Département de Chimie, Faculté des Sciences, Université de Setif-1, Algérie

<sup>5</sup> Laboratoire de Chimie, Ingénierie Moléculaire et Nanostructures (LCIMN), Université Ferhat Abbas Sétif 1, Sétif 19000, Algérie.

<sup>6</sup> Université de Lyon, Université Claude Bernard Lyon 1, Institut des Sciences Analytiques, UMR CNRS 5280, 69622 Villeurbanne Cedex, France

### List of table and figures

|                                                                                                                                                                                                                                                                                                               |    |
|---------------------------------------------------------------------------------------------------------------------------------------------------------------------------------------------------------------------------------------------------------------------------------------------------------------|----|
| Table S1: Calculated static polarizability and its anisotropy polarizability and first hyperpolarizability of 1C at CAM-B3LYP/basis sets/IEFPCM level in THF                                                                                                                                                  | S3 |
| Table S2: TD-CAM-B3LYP/6-31G(d,p) absorption ( $\lambda_{\text{abs}}$ ), emission ( $\lambda_{\text{em}}$ ) wavelengths and transition dipole moment ( $\mu_{0 \rightarrow 1}$ ) for compounds iM, iH and iC; experimental values are given in parentheses from the work of Dong Kyun You et al. <sup>1</sup> | S3 |
| Table S3: Total energy ( $E$ , a.u.), HOMO and LUMO energies (eV) of the ground state (S0), first excited state (S1) wavelength (nm), and oscillator strength of the emission transition S1→S0 for compounds iM, iH, and iC, calculated at the CAM-B3LYP/6-31G(d,p)/IEFPCM level in THF                       | S5 |
| Table S4: TD-DFT calculated excited-state ( $S_n$ ) parameters of the title compounds: transition energies (eV), wavelengths (nm), oscillator strengths, and electronic configurations, calculated at the CAM-B3LYP/6-31G(d,p)/IEFPCM level in THF.                                                           | S6 |
| Table S5. Calculated Overlap (Sr), D Index (Å), H index(Å), Variation of dipole moment                                                                                                                                                                                                                        | S8 |

|                                                                                                                                                                                                                                                                                                                                                                                                                         |     |
|-------------------------------------------------------------------------------------------------------------------------------------------------------------------------------------------------------------------------------------------------------------------------------------------------------------------------------------------------------------------------------------------------------------------------|-----|
| with respect to ground state ( $\Delta\mu$ , a.u.), Hole delocalization index (HDI), Electron delocalization index (EDI), Ghost-hunter index 1 <sup>st</sup> and 2 <sup>en</sup> , Coulomb attractive energy ( $E_{CA}$ ) for iM, iH and iC compounds in the first excited state at the CAM-B3LYP/6-31G(d,p)/IEFPCM Level                                                                                               |     |
| Table S6. Contribution of each fragment to hole and electron (I), Variation of population number of fragment (II) and intrafragment electron redistribution of fragment (III) calculated in tetrahydrofuran at the CAM-B3LYP/6-31G(d,p)/IEFPCM Level                                                                                                                                                                    | S10 |
| Table S7. Intrinsic charge transfer percentage, CT(%), Intrinsic local excitation percentage, LE(%) and Transferred electrons between fragments, calculated for the electronic transition $S_{0 \rightarrow i}$ of the iM, iH and iC compounds at the CAM-B3LYP/6-31G(d,p)/IEFPCM Level in tetrahydrofuran                                                                                                              | S14 |
| Table S8. Calculated dynamic polarizability ( $\langle\alpha\rangle$ ) and polarizability anisotropy ( $\Delta\alpha$ )                                                                                                                                                                                                                                                                                                 | S18 |
| Figure S1. Simulated absorption spectrum of the title compounds                                                                                                                                                                                                                                                                                                                                                         | S20 |
| Figure S2. CDD for different excited states of the title compounds. CDD was calculated as a difference between the corresponding excited state and the ground state of the considered system using the CAM-B3LYP/6-31G(d,p)/IEFPCM level of theory. <b>Blue regions indicate negative electron density, whereas orange regions correspond to positive electron density. The isosurface level is set to be 0.001807.</b> | S26 |
| Figure S3 : Correlation Between static First Hyperpolarizability $\beta_{HRS}$ and $\beta(0;0,0)$ for iM, iH and iC compounds (i=1 to 9), calculated at the CAM-B3LYP/6-31G(d,p)/IEFPCM level in THF.                                                                                                                                                                                                                   | S27 |
| Figure S4. Correlation Between dynamic and static First Hyperpolarizability $\beta_{HRS}$ for iM, iH and iC compounds (i=1 to 9), calculated at the CAM-B3LYP/6-31G(d,p)/IEFPCM level in THF                                                                                                                                                                                                                            | S28 |
| Figure S5. Plots of static first hyperpolarizability values as computed in the SOS formalism as a function of the number of excited states for iM, iH and iC compounds (i=1 to 9), calculated at the CAM-B3LYP/6-31G(d,p)/IEFPCM level in THF.                                                                                                                                                                          | S29 |
| Figure S6. Linear Correlation Between First Hyperpolarizability and Dipole Moment Variation ( $\Delta\mu$ ) in the First Excited State for iM, iH and iC (i=1 to 9) compounds                                                                                                                                                                                                                                           | S30 |

**Table S1.** Calculated static polarizability and its anisotropy polarizability and first hyperpolarizability of 1C at CAM-B3LYP/basis sets/IEFPCM level in THF

|                           |    | 6-31++G(d,p) | 6-31++G   | 6-31+G(d,p) | 6-31+G    | 6-31G(d,p) | 6-311G(d) | 6-31G(d)  |
|---------------------------|----|--------------|-----------|-------------|-----------|------------|-----------|-----------|
| Number of basis functions |    | 774          | 501       | 747         | 474       | 619        | 665       | 538       |
| $\alpha$                  | 1C | 438          | 423       | 437         | 422       | 394        | 418       | 391       |
| $\Delta\alpha$            | 1C | 190          | 180       | 190         | 181       | 253        | 200       | 203       |
| $\beta_{HRS}^{\infty}/DR$ | 1C | 220/6.112    | 178/6.517 | 213/6.155   | 174/6.599 | 322/6.341  | 422/7.913 | 324/6.350 |

**Table S2:** TD-CAM-B3LYP/6-31G(d,p)) absorption ( $\lambda_{abs}$ ), emission ( $\lambda_{em}$ ) wavelengths and transition dipole moment ( $\mu_{0\rightarrow 1}$ ) for compounds iM, iH and iC; experimental values are given in parentheses from the work of Dong Kyun You et al.<sup>1</sup>

| Mi | $\lambda_{abs}$ (nm) | $\lambda_{em}$ (nm) | $\mu_{0\rightarrow 1}$ (a.u.) |
|----|----------------------|---------------------|-------------------------------|
| 1M | 270                  | 350.27              | 3.372                         |
| 1H | 245                  | 326.22              | 2.973                         |
| 1C | 247 (265)            | 399.36 (454)        | 2.967                         |
| 2M | 266                  | 346.59              | 3.279                         |
| 2H | 245                  | 422.24              | 2.829                         |
| 2C | 247 (266)            | 420.04 (475)        | 2.828                         |
| 3M | 266                  | 346.65              | 3.273                         |
| 3H | 245                  | 417.74              | 2.830                         |
| 3C | 247 (267)            | 415.59 (476)        | 2.823                         |
| 4M | 269                  | 351.48              | 3.435                         |
| 4H | 250                  | 430.79              | 3.009                         |
| 4C | 252 (274)            | 428.84 (491)        | 3.006                         |
| 5M | 270                  | 351.49              | 3.538                         |
| 5H | 251                  | 430.46              | 3.129                         |
| 5C | 253 (275)            | 428.23 (492)        | 3.120                         |
| 6M | 275                  | 358.23              | 3.508                         |
| 6H | 259                  | 336.25              | 3.064                         |
| 6C | 262 (289)            | 455.32 (516)        | 3.060                         |
| 7M | 273                  | 355.51              | 3.409                         |
| 7H | 256                  | 332.95              | 2.954                         |
| 7C | 260                  | 451.03              | 2.955                         |
| 8M | 285                  | 373                 | 3.543                         |
| 8H | 273                  | 506.18              | 3.118                         |

|    |     |        |       |
|----|-----|--------|-------|
| 8C | 276 | 505.16 | 3.124 |
| 9M | 303 | 381.88 | 3.956 |
| 9H | 292 | 520.38 | 3.550 |
| 9C | 296 | 522.67 | 3.351 |

**Table S3:** Total energy ( $E$ , a.u.), HOMO and LUMO energies (eV) of the ground state (S0), first excited state (S1) and oscillator strength of the emission transition S1→S0 for compounds iM, iH, and iC, calculated at the TD-CAM-B3LYP/6-31G(d,p)/IEFPCM level in THF

|    |    | E         | HOMO   | LUMO   | f      |
|----|----|-----------|--------|--------|--------|
| 1M | GS | -1284.728 | -7.483 | -0.364 | /      |
|    | S1 | -1284.581 | -6.993 | -1.053 | 1.557  |
| 1H | GS | 1130.667  | -8.046 | -0.383 | /      |
|    | S1 | -1130.509 | -7.456 | -1.143 | 1,352  |
| 1C | GS | 1539.264  | -8.033 | -0.410 | /      |
|    | S1 | -1539.115 | -7.619 | 2.304  | 1,15   |
| 2M | GS | -1046.980 | -7.293 | -0.119 | /      |
|    | S1 | 1046.980  | -6.754 | -0.762 | 1,507  |
| 2H | GS | -892.920  | -7.712 | -0.118 | /      |
|    | S1 | -892.772  | -7.320 | -2.286 | 1,225  |
| 2C | GS | -1301.517 | -7.701 | -0.160 | /      |
|    | S1 | -1301.373 | -7.293 | -2.231 | 1,111  |
| 3M | GS | -947.766  | -7.312 | -0.116 | /      |
|    | S1 | -947.618  | -6.785 | -0.777 | 1,504  |
| 3H | GS | -793.705  | -7.771 | -0.118 | /      |
|    | S1 | -793.557  | -7.412 | -2.284 | 1,217  |
| 3C | GS | -1202.302 | -7.760 | -0.157 | /      |
|    | S1 | -1202.157 | -7.381 | -2.254 | 1,103  |
| 4M | GS | -987.061  | -7.196 | -0.083 | /      |
|    | S1 | -986.615  | -6.661 | -0.720 | 1,608  |
| 4H | GS | -833.001  | -7.570 | -0.081 | /      |
|    | S1 | -832.856  | -7.226 | -2.253 | 1,299  |
| 4C | GS | -1241.598 | -7.561 | -0.123 | /      |
|    | S1 | -1241.457 | -7.195 | -2.230 | 1.1787 |
| 5M | GS | -1104.933 | -7.197 | -0.090 | /      |
|    | S1 | -1104.787 | -6.667 | -0.726 | 1,674  |
| 5H | GS | -950.873  | -7.572 | -0.088 | /      |
|    | S1 | -950.728  | -7.211 | -2.259 | 1,339  |
| 5C | GS | -1359.470 | -7.568 | -0.125 | /      |
|    | S1 | -1359.328 | -7.200 | -2.231 | 1,216  |
| 6M | GS | -1062.247 | -6.997 | -0.027 | /      |

|    |    |           |        |        |        |
|----|----|-----------|--------|--------|--------|
|    | S1 | -1062.104 | -6.449 | -0.601 | 1,651  |
| 6H | GS | -908.187  | -7.199 | -0.002 | /      |
|    | S1 | -908.036  | -6.696 | -0.555 | 1,431  |
| 6C | GS | -1316.784 | -7.210 | -0.066 | /      |
|    | S1 | 1316.649  | -6.859 | -2.194 | 1,223  |
| 7M | GS | -1022.969 | -6.997 | -0.022 | /      |
|    | S1 | -1022.825 | -6.478 | -0.604 | 1,589  |
| 7H | GS | -868.909  | -7.248 | -0.002 | /      |
|    | S1 | -868.756  | -6.737 | -0.557 | 1,367  |
| 7C | GS | -1277.506 | -7.258 | -0.061 | /      |
|    | S1 | 1277.370  | -6.868 | -2.201 | 1,178  |
| 8M | GS | -1003.105 | -6.627 | 0.037  | /      |
|    | S1 | -1002.968 | -6.061 | -0.411 | 1,694  |
| 8H | GS | -849.045  | -6.788 | 0.046  | /      |
|    | S1 | -848.917  | -6.406 | -2.151 | 1,356  |
| 8C | GS | -1257.642 | -6.787 | 0.000  | /      |
|    | S1 | -1257.517 | -6.327 | -2.138 | 1,235  |
| 9M | GS | -1081.669 | -7.255 | -0.123 | /      |
|    | S1 | -1081.536 | -5.963 | -0.419 | 1,798  |
| 9H | GS | -927.609  | 10.569 | 0.059  | /      |
|    | S1 | -927.484  | -6.271 | -2.146 | 1,4319 |
| 9C | GS | 1336.206  | -6.434 | 0.018  | /      |
|    | S1 | -1336.086 | -6.240 | -2.154 | 1,296  |

**Table S4.** TD-DFT calculated excited-state ( $S_n$ ) parameters of the title compounds: transition energies ( $\Delta E$ (eV)), absorption wavelengths ( $\lambda_{\text{abs}}$  (nm)), oscillator strengths ( $f$ ) and electronic transition, calculated at the CAM-B3LYP/6-31G(d,p)/IEFPCM level in THF.

| Compounds | $S_n$ | $\lambda$ (nm) | E (eV) | $f$   | Electronic Transition    |
|-----------|-------|----------------|--------|-------|--------------------------|
| 1M        | S1    | 270            | 4.614  | 1.285 | H→L 92%                  |
|           | S11   | 183            | 6.763  | 1.327 | H-1→L+2 46%, H-2→L+1 30% |
| 1H        | S1    | 245            | 5.053  | 1.094 | H→L 95%                  |
|           | S7    | 185            | 6.7    | 1.293 | H-1→L+1 54%, H-2→L+2 32% |
| 1C        | S1    | 247            | 5.020  | 1.087 | H→L 95%                  |
|           | S7    | 185            | 6.681  | 1.086 | H-1→L+1 50%, H-2→L+2 27% |
| 2M        | S1    | 266            | 4.651  | 1.225 | H→L 92%                  |
|           | S11   | 183            | 6.766  | 1.326 | H-1→L+2 44%, H-3→L+1 28% |
| 2H        | S1    | 245            | 5.043  | 0.990 | H→L 92%                  |
|           | S7    | 186            | 6.663  | 0.740 | H-1→L+1 23%, H-1→L+2 18% |
|           | S8    | 182            | 6.808  | 0.598 | H-3→L 30%, H→L+3 14%     |
| 2C        | S1    | 247            | 5.000  | 0.985 | H→L 92%                  |
|           | S7    | 186            | 6.645  | 0.682 | H-1→L+1 36%, H-2→L+2 28% |
|           | S8    | 183            | 6.779  | 0.676 | H-3→L 33%, H-1→L+1 24%   |
| 3M        | S1    | 266            | 4.656  | 1.222 | H→L 92%                  |
|           | S11   | 183            | 6.759  | 1.288 | H-3→L+1 54%, H-1→L+2 32% |
|           | S14   | 170            | 7.282  | 0.147 | H-4→L+4 15%, H-3→L+1 14% |

|    |     |     |       |       |                            |
|----|-----|-----|-------|-------|----------------------------|
|    | S23 | 159 | 7.803 | 0.042 | H-6→L 48%, H-11→L 12%      |
| 3H | S1  | 245 | 5.064 | 0.994 | H → L 95%                  |
|    | S7  | 186 | 6.670 | 0.937 | H-2 →L+1 42%, H-1→L+3 33%  |
| 3C | S1  | 247 | 5.024 | 0.987 | H →L 95%                   |
|    | S7  | 186 | 6.651 | 0.865 | H-2→L+1 40%, H-1 →L+3 32%  |
|    | S8  | 183 | 6.783 | 0.496 | H-3→L 36%, H-2 →L+121%     |
| 4M | S1  | 269 | 4.601 | 1.331 | H →L 92%                   |
|    | S11 | 183 | 6.748 | 1.354 | H-3 →L+1 50%, H-1 →L+2 32% |
| 4H | S1  | 250 | 4.950 | 1.099 | H →L 92%                   |
|    | S7  | 187 | 6.615 | 0.437 | H-1→L+3 27%, H-2 →L+1 23%  |
|    | S8  | 183 | 6.757 | 0.747 | H →L+2 27%, H-2 →L+1 24%   |
|    | S9  | 183 | 6.778 | 0.29  | H →L+2 46%, H-3 →L+2 12%   |
| 4C | S1  | 252 | 4.909 | 1.039 | H →L 92%                   |
|    | S7  | 188 | 6.593 | 0.36  | H-1→L+3 24%, H-2 →L+1 20%  |
|    | S8  | 184 | 6.734 | 1.052 | H-2→L+1 38%, H-3→L+2 23%   |
| 5M | S1  | 270 | 4.592 | 1.409 | H→L 92%                    |
|    | S11 | 184 | 6.736 | 1.431 | H-3→L+1 50%, H-1→L+2 20%   |
|    | S24 | 158 | 7.819 | 0.321 | H-6→L 25%,H-2→L+524%       |
| 5H | S1  | 251 | 4.938 | 1.185 | H-1→L 92%                  |
|    | S7  | 187 | 6.611 | 0.541 | H-2→L+3 28%, H-2→L+1 24%   |
|    | S8  | 184 | 6.753 | 0.832 | H-2→L+1 24%, H→L+2 20%     |
|    | S9  | 183 | 6.779 | 0.188 | H→L+2 52%, H-3→L+214%      |
| 5C | S1  | 253 | 4.907 | 1.175 | H→L 92%                    |
|    | S7  | 188 | 6.590 | 0.431 | H-1→L+3 27%, H-2→L+1 20%   |
|    | S8  | 184 | 6.730 | 1.093 | H-1→L+1 36%, H-3→L 24%     |
| 6M | S1  | 275 | 4.510 | 1.361 | H→L 92%                    |
|    | S9  | 195 | 6.366 | 0.161 | H-2 →L 32%. H →L+3 32%     |
|    | S11 | 183 | 6.765 | 1.431 | H-3→L+126%. H-2→L+126%     |
|    | S21 | 160 | 7.729 | 0.404 | H-2 →L+3 28%. H-1→L+320%   |
| 6H | S1  | 259 | 4.792 | 1.103 | H →L 92%                   |
|    | S8  | 184 | 6.732 | 1.367 | H-2 →L+1 51%, H-3 →L 16%   |
| 6C | S1  | 262 | 4.731 | 1.093 | H →L 92%                   |
|    | S9  | 184 | 6.724 | 1.467 | H-2 →L+1 56%, H-3 →L 13%   |
| 7M | S1  | 273 | 4.537 | 1.293 | H→L 92%                    |
|    | S11 | 183 | 6.776 | 1.434 | H-1→L+1 32%,H-3→L+2 14%    |
|    | S22 | 159 | 7.781 | 0.607 | H-1→L+3 46%, H-4→L+4 14%   |
| 7H | S1  | 256 | 4.836 | 1.035 | H→L 89%                    |
|    | S7  | 190 | 6.522 | 0.063 | H →L+3 23%, H-3 →L 20%     |
|    | S8  | 183 | 6.745 | 1.270 | H-2 →L+1 52%, H-3 →L 20%   |
| 7C | S1  | 260 | 4.774 | 1.028 | H→L 92%                    |
|    | S9  | 184 | 6.735 | 1.386 | H-2→L+156%, H-3→L 16%      |
| 8M | S1  | 285 | 4.355 | 1.339 | H →L 89%                   |
|    | S12 | 183 | 6.774 | 1.505 | H-3 →L+1 35%, H-2 →L+2 25% |
|    | S23 | 161 | 7.691 | 0.313 | H-3 →L+2 40%, H-1 →L+3 13% |
| 8H | S1  | 273 | 4.534 | 1.080 | H →L 89%                   |

|    |     |     |       |       |                                       |
|----|-----|-----|-------|-------|---------------------------------------|
|    | S9  | 184 | 6.733 | 1.586 | H-3 → L+1 48%, H-1 → L+3 23%          |
| 8C | S1  | 276 | 4.498 | 1.082 | H → L 89%                             |
|    | S9  | 185 | 6.705 | 1.328 | H-3 → L+1 58%, H-1 → L+3 11%          |
| 9M | S1  | 303 | 4.089 | 1.568 | H→L 88%                               |
|    | S12 | 186 | 6.662 | 1.510 | H-2→L+2 40%, H-3→L+1 24%, H-2→L+1 22% |
| 9H | S1  | 292 | 4.243 | 1.311 | H→L 85%                               |
|    | S9  | 187 | 6.608 | 1.575 | H-3→L+1 58%, H-2→L+3 24%              |
| 9C | S1  | 296 | 4.187 | 1.309 | H→L 88%                               |
|    | S10 | 187 | 6.622 | 1.270 | H-3→L+1 38%, H-1 → L+3 31%, H→L+4 11% |

Table S5. Calculated Overlap (Sr), D Index (Å), H index(Å), Variation of dipole moment with respect to ground state ( $\Delta\mu$ , a.u.), Hole delocalization index (HDI), Electron delocalization index (EDI), Ghost-hunter index 1<sup>st</sup> and 2<sup>en</sup>, Coulomb attractive energy ( $E_{CA}$ ) for iM, iH and iC compounds in the first excited state at the CAM-B3LYP/6-31G(d,p)/IEFPCM Level

|    | Sn  | Sr    | D (Å) | $\Delta\mu$ | H     | HDI  | EDI  | 1 <sup>st</sup> | $E_{CA}$ |
|----|-----|-------|-------|-------------|-------|------|------|-----------------|----------|
| 1M | S1  | 0.845 | 0.577 | 1.090       | 3.417 | 6.84 | 6.28 | 7.467           | 5.274    |
|    | S11 | 0.924 | 0.059 | 0.112       | 2.804 | 7.11 | 7.00 | 9.98            | 5.538    |
| 1H | S1  | 0.851 | 0.250 | 0.472       | 3.072 | 6.91 | 6.57 | 7.953           | 5.572    |
|    | S7  | 0.919 | 0.158 | 0.297       | 2.937 | 6.93 | 6.59 | 9.869           | 5.343    |
| 1C | S1  | 0.850 | 0.240 | 0.453       | 3.114 | 6.86 | 6.50 | 7.915           | 5.450    |
|    | S7  | 0.919 | 0.175 | 0.330       | 2.955 | 6.90 | 6.59 | 9.850           | 5.235    |
| 2M | S1  | 0.847 | 0.193 | 0.364       | 3.380 | 6.63 | 6.64 | 7.517           | 5.347    |
|    | S11 | 0.921 | 0.202 | 0.384       | 2.856 | 6.95 | 6.80 | 9.953           | 5.478    |
| 2H | S1  | 0.830 | 1.091 | 2.061       | 3.021 | 6.96 | 6.95 | 7.9             | 5.540    |
|    | S7  | 0.926 | 0.404 | 0.763       | 2.994 | 6.53 | 6.20 | 9.834           | 5.277    |
|    | S8  | 0.919 | 0.714 | 1.349       | 3.147 | 6.05 | 5.96 | 9.489           | 5.355    |
| 2C | S1  | 0.828 | 1.113 | 2.103       | 3.073 | 6.90 | 6.86 | 7.84            | 5.392    |
|    | S7  | 0.927 | 0.446 | 0.842       | 3.039 | 6.42 | 6.08 | 9.805           | 5.143    |
|    | S8  | 0.927 | 0.550 | 1.038       | 3.144 | 5.89 | 5.97 | 9.471           | 5.252    |
| 3M | S1  | 0.849 | 0.048 | 0.091       | 3.352 | 6.68 | 6.57 | 7.35            | 5.368    |
|    | S11 | 0.925 | 0.121 | 0.228       | 2.738 | 7.32 | 7.19 | 9.968           | 5.630    |
|    | S14 | 0.853 | 0.591 | 1.116       | 3.284 | 5.80 | 6.04 | 9.758           | 5.166    |
|    | S23 | 0.653 | 0.975 | 1.841       | 4.457 | 5.92 | 5.94 | 10.97           | 4.241    |
| 3H | S1  | 0.839 | 0.877 | 1.656       | 2.997 | 6.90 | 6.82 | 7.953           | 5.587    |
|    | S7  | 0.921 | 0.329 | 0.621       | 2.963 | 6.67 | 6.35 | 9.844           | 5.315    |
| 3C | S1  | 0.837 | 0.899 | 1.698       | 3.045 | 6.85 | 6.74 | 7.906           | 5.441    |
|    | S7  | 0.922 | 0.359 | 0.678       | 2.998 | 6.56 | 6.25 | 9.819           | 5.182    |
|    | S8  | 0.920 | 0.504 | 0.953       | 3.110 | 5.94 | 6.00 | 9.491           | 5.317    |
| 4M | S1  | 0.845 | 0.290 | 0.548       | 3.438 | 6.44 | 6.58 | 7.45            | 5.274    |
|    | S11 | 0.926 | 0.148 | 0.278       | 2.798 | 7.14 | 7.00 | 9.947           | 5.551    |
|    | S24 | 0.479 | 3.509 | 6.633       | 3.925 | 9.14 | 6.14 | 10.397          | 4.048    |
| 4H | S1  | 0.826 | 1.160 | 2.191       | 3.073 | 6.88 | 6.81 | 7.799           | 5.458    |

|    |     |        |       |        |       |      |      |        |       |
|----|-----|--------|-------|--------|-------|------|------|--------|-------|
|    | S7  | 0.932  | 0.573 | 1.081  | 3.020 | 6.22 | 5.89 | 9.755  | 5.264 |
|    | S8  | 0.926  | 0.639 | 1.206  | 3.194 | 5.86 | 5.69 | 9.429  | 5.273 |
|    | S9  | 0.462  | 4.141 | 7.824  | 2.950 | 6.76 | 6.78 | 9.168  | 3.962 |
| 4C | S1  | 0.824  | 1.182 | 2.233  | 3.113 | 6.81 | 6.73 | 7.750  | 5.320 |
|    | S7  | 0.936  | 0.646 | 1.221  | 3.069 | 6.03 | 5.67 | 9.700  | 5.128 |
|    | S8  | 0.937  | 0.432 | 0.817  | 3.161 | 5.73 | 5.73 | 9.434  | 5.203 |
| 5M | S1  | 0.846  | 0.291 | 0.549  | 3.465 | 6.42 | 6.56 | 7.447  | 5.237 |
|    | S11 | 0.927  | 0.136 | 0.256  | 2.816 | 7.15 | 7.02 | 9.941  | 5.524 |
|    | S24 | 0.447  | 2.429 | 4.590  | 2.786 | 9.46 | 7.66 | 10.277 | 4.961 |
| 5H | S1  | 0.827  | 1.173 | 2.217  | 3.095 | 6.83 | 6.80 | 7.798  | 5.417 |
|    | S7  | 0.930  | 0.558 | 1.055  | 3.045 | 6.27 | 5.91 | 9.748  | 5.224 |
|    | S8  | 0.922  | 0.718 | 1.355  | 3.234 | 5.81 | 5.68 | 9.424  | 5.213 |
|    | S9  | 0.4702 | 4.117 | 7.780  | 2.978 | 6.75 | 6.72 | 9.177  | 3.968 |
| 5C | S1  | 0.8253 | 1.201 | 2.269  | 3.142 | 6.78 | 6.69 | 7.76   | 5.290 |
|    | S7  | 0.934  | 0.642 | 1.213  | 3.094 | 6.07 | 5.70 | 9.697  | 5.096 |
|    | S8  | 0.935  | 0.505 | 0.954  | 3.176 | 5.71 | 5.75 | 9.436  | 5.184 |
| 6M | S1  | 0.827  | 0.935 | 1.767  | 3.514 | 6.33 | 6.67 | 7.288  | 5.152 |
|    | S9  | 0.902  | 1.037 | 1.958  | 3.393 | 6.56 | 6.39 | 9.001  | 5.150 |
|    | S11 | 0.922  | 0.173 | 0.326  | 3.006 | 6.56 | 6.47 | 9.937  | 5.298 |
|    | S21 | 0.852  | 0.995 | 1.880  | 3.899 | 6.22 | 6.17 | 10.614 | 4.685 |
| 6H | S1  | 0.794  | 1.750 | 3.306  | 3.147 | 7.30 | 6.87 | 7.549  | 5.235 |
|    | S8  | 0.948  | 0.342 | 0.647  | 3.044 | 6.32 | 5.92 | 9.581  | 5.293 |
| 6C | S1  | 0.788  | 1.811 | 3.421  | 3.137 | 7.26 | 6.85 | 7.481  | 5.156 |
|    | S9  | 0.927  | 0.717 | 1.354  | 3.162 | 6.27 | 5.64 | 9.555  | 5.016 |
| 7M | S1  | 0.828  | 0.858 | 1.621  | 3.475 | 6.35 | 6.71 | 7.319  | 5.212 |
|    | S11 | 0.923  | 0.175 | 0.330  | 2.995 | 6.58 | 6.45 | 9.950  | 5.320 |
|    | S22 | 0.852  | 0.472 | 0.891  | 4.242 | 5.67 | 6.20 | 10.699 | 4.577 |
| 7H | S1  | 0.795  | 1.714 | 3.238  | 3.090 | 7.20 | 7.00 | 7.59   | 5.322 |
|    | S7  | 0.916  | 1.545 | 2.9193 | 3.312 | 5.85 | 5.01 | 9.351  | 4.923 |
|    | S8  | 0.950  | 0.460 | 0.869  | 3.049 | 6.17 | 5.84 | 9.527  | 5.323 |
| 7C | S1  | 0.790  | 1.754 | 3.314  | 3.096 | 7.21 | 6.92 | 7.522  | 5.224 |
|    | S9  | 0.924  | 0.872 | 1.647  | 3.172 | 6.17 | 5.51 | 9.503  | 5.003 |
| 8M | S1  | 0.798  | 1.591 | 3.005  | 3.536 | 6.47 | 6.70 | 7.017  | 5.055 |
|    | S12 | 0.921  | 0.079 | 0.150  | 3.034 | 6.56 | 6.42 | 9.962  | 5.272 |
|    | S23 | 0.232  | 4.043 | 7.640  | 2.119 | 9.56 | 9.11 | 9.862  | 3.787 |
| 8H | S1  | 0.751  | 2.249 | 4.251  | 3.11  | 7.67 | 6.98 | 7.176  | 5.158 |
|    | S9  | 0.930  | 0.183 | 0.3448 | 2.967 | 6.79 | 6.38 | 9.760  | 5.330 |
| 8C | S1  | 0.750  | 2.281 | 4.309  | 3.162 | 7.57 | 6.84 | 7.132  | 4.996 |
|    | S9  | 0.926  | 0.194 | 0.367  | 2.944 | 6.97 | 6.52 | 9.739  | 5.259 |
| 9M | S1  | 0.769  | 2.165 | 4.090  | 3.602 | 7.20 | 6.56 | 6.755  | 4.808 |
| 9H | S1  | 0.731  | 2.551 | 4.821  | 3.231 | 8.33 | 6.73 | 6.896  | 4.873 |
|    | S9  | 0.914  | 0.354 | 0.668  | 3.019 | 6.95 | 6.40 | 9.750  | 5.233 |

|                |     |       |       |       |       |      |      |       |       |
|----------------|-----|-------|-------|-------|-------|------|------|-------|-------|
| <sup>9</sup> C | S1  | 0.723 | 2.648 | 5.003 | 3.222 | 8.36 | 6.70 | 6.824 | 4.764 |
|                | S10 | 0.876 | 1.281 | 2.420 | 3.375 | 6.15 | 5.48 | 9.562 | 4.663 |

**Table S6.** Contribution of each fragment to hole and electron (I), Variation of population number of fragment (II) and intrafragment electron redistribution of fragment (III) calculated in tetrahydrofuran at the CAM-B3LYP/6-31G(d,p)/IEFPCM Level

| Molecule | Sn  | Frag  | I      |           | II       | III      |
|----------|-----|-------|--------|-----------|----------|----------|
|          |     |       | Hole % | Electron% |          |          |
| 1M       | S1  | Frag1 | 30.15  | 22.16     | -0.07988 | 0.06682  |
|          |     | Frag2 | 68.70  | 75.63     | 0.06929  | 0.51953  |
|          |     | Frag3 | 1.15   | 2.21      | 0.01059  | 0.00025  |
|          | S11 | Frag1 | 1.38   | 2.04      | 0.00658  | 0.00028  |
|          |     | Frag2 | 98.13  | 97.45     | -0.00680 | 0.95637  |
|          |     | Frag3 | 0.48   | 0.51      | 0.00022  | 0.00002  |
| 1H       | S1  | Frag1 | 5.32   | 9.35      | 0.04033  | 0.00497  |
|          |     | Frag2 | 92.3   | 87.35     | -0.04955 | 0.80624  |
|          |     | Frag3 | 2.38   | 3.30      | 0.00922  | 0.00079  |
|          | S7  | Frag1 | 1.88   | 5.29      | 0.03414  | 0.00100  |
|          |     | Frag2 | 97.65  | 94.12     | -0.03533 | 0.91910  |
|          |     | Frag3 | 0.47   | 0.59      | 0.00119  | 0.00003  |
| 1C       | S1  | Frag1 | 6.30   | 10.59     | 0.04290  | 0.00668  |
|          |     | Frag2 | 91.31  | 86.16     | -0.05153 | 0.78678  |
|          |     | Frag3 | 2.38   | 3.25      | 0.00864  | 0.00077  |
|          | S7  | Frag1 | 3.41   | 6.84      | 0.03431  | 0.00233  |
|          |     | Frag2 | 96.12  | 92.62     | -0.03497 | 0.89030  |
|          |     | Frag3 | 0.47   | 0.54      | 0.00066  | 0.00003  |
| 2M       | S1  | Frag1 | 27.77  | 25.01     | -0.02766 | 0.06954  |
|          |     | Frag2 | 70.39  | 73.95     | 0.03560  | 0.52054  |
|          |     | Frag3 | 1.84   | 1.04      | -0.00794 | 0.00019  |
|          | S11 | Frag1 | 3.34   | 2.54      | -0.00808 | 0.00085  |
|          |     | Frag2 | 97.75  | 98.13     | 0.00610  | 0.95920  |
|          |     | Frag3 | 0.16   | 0.35      | 0.00198  | 0.00001  |
| 2H       | S1  | Frag1 | 8.67   | 12.77     | 0.04485  | 0.01102  |
|          |     | Frag2 | 91.37  | 87.23     | -0.02324 | 0.79698  |
|          |     | Frag3 | 3.71   | 1.55      | -0.02160 | 0.00057  |
|          | S7  | Frag1 | 1.62   | 6.36      | 0.04742  | -0.04699 |
|          |     | Frag2 | 97.63  | 93.35     | -0.04283 | -0.00043 |
|          |     | Frag3 | 0.75   | 0.29      | -0.00459 | -0.00416 |
|          | S8  | Frag1 | 6.00   | 13.87     | 0.07868  | 0.00833  |
|          |     | Frag2 | 90.75  | 84.64     | -0.06109 | 0.76811  |
|          |     | Frag3 | 3.25   | 1.19      | -0.01760 | 0.00048  |
| 2C       | S1  | Frag1 | 5.82   | 13.20     | 0.07385  | 0.00768  |
|          |     | Frag2 | 90.48  | 85.27     | -0.05209 | 0.77147  |
|          |     | Frag3 | 3.71   | 1.53      | -0.02176 | 0.00057  |
|          | S7  | Frag1 | 3.85   | 8.57      | 0.04878  | 0.00321  |
|          |     | Frag2 | 96.25  | 91.43     | -0.04317 | 0.88005  |
|          |     | Frag3 | 0.88   | 0.32      | -0.00560 | 0.00003  |
|          | S8  | Frag1 | 7.87   | 13.05     | 0.05185  | 0.01027  |
|          |     | Frag2 | 89.02  | 85.53     | -0.03490 | 0.76136  |
|          |     | Frag3 | 3.12   | 1.42      | -0.01695 | 0.00044  |

|    |     |       |       |       |          |         |
|----|-----|-------|-------|-------|----------|---------|
| 3M | S1  | Frag1 | 28.19 | 24.80 | -0.03390 | 0.06990 |
|    |     | Frag2 | 71.33 | 74.62 | 0.03285  | 0.53229 |
|    |     | Frag3 | 0.48  | 0.58  | 0.00105  | 0.00003 |
|    | S11 | Frag1 | 2.23  | 1.91  | -0.00325 | 0.00043 |
|    |     | Frag2 | 97.68 | 97.86 | 0.00180  | 0.95597 |
|    |     | Frag3 | 0.08  | 0.23  | 0.00145  | 0.00000 |
|    | S14 | Frag1 | 17.31 | 6.07  | -0.11239 | 0.01051 |
|    |     | Frag2 | 82.13 | 93.52 | 0.11382  | 0.76808 |
|    |     | Frag3 | 0.56  | 0.41  | -0.00142 | 0.00002 |
|    | S23 | Frag1 | 35.01 | 22.64 | -0.12354 | 0.07930 |
|    |     | Frag2 | 64.53 | 76.02 | 0.11485  | 0.49059 |
|    |     | Frag3 | 0.46  | 1.33  | 0.00869  | 0.00006 |
| 3H | S1  | Frag1 | 5.12  | 11.14 | 0.06013  | 0.00571 |
|    |     | Frag2 | 93.95 | 88.00 | -0.05948 | 0.82682 |
|    |     | Frag3 | 0.92  | 0.86  | -0.00065 | 0.00008 |
|    | S7  | Frag1 | 1.59  | 5.85  | 0.04269  | 0.00093 |
|    |     | Frag2 | 98.23 | 93.92 | -0.04310 | 0.92255 |
|    |     | Frag3 | 0.19  | 0.23  | 0.00041  | 0.00000 |
| 3C | S1  | Frag1 | 6.09  | 12.96 | 0.06873  | 0.00789 |
|    |     | Frag2 | 93.09 | 86.40 | -0.06815 | 0.80434 |
|    |     | Frag3 | 0.91  | 0.86  | -0.00058 | 0.00008 |
|    | S7  | Frag1 | 2.85  | 7.56  | 0.04711  | 0.00215 |
|    |     | Frag2 | 96.95 | 92.21 | -0.04738 | 0.89393 |
|    |     | Frag3 | 0.20  | 0.23  | 0.00027  | 0.00000 |
|    | S8  | Frag1 | 7.01  | 12.55 | 0.05545  | 0.00880 |
|    |     | Frag2 | 92.25 | 86.49 | -0.05760 | 0.79789 |
|    |     | Frag3 | 0.74  | 0.95  | 0.00214  | 0.00007 |
| 4M | S1  | Frag1 | 25.03 | 23.01 | -0.02018 | 0.05759 |
|    |     | Frag2 | 73.02 | 75.43 | 0.02403  | 0.55078 |
|    |     | Frag3 | 1.92  | 1.56  | -0.00385 | 0.00030 |
|    | S11 | Frag1 | 2.30  | 1.89  | -0.00419 | 0.00043 |
|    |     | Frag2 | 97.41 | 97.23 | -0.00177 | 0.94707 |
|    |     | Frag3 | 0.29  | 0.89  | 0.00596  | 0.00003 |
|    | S24 | Frag1 | 82.40 | 41.34 | -0.41058 | 0.34064 |
|    |     | Frag2 | 16.67 | 57.20 | 0.40529  | 0.09537 |
|    |     | Frag3 | 0.93  | 1.46  | 0.00529  | 0.00014 |
| 4H | S1  | Frag1 | 4.41  | 10.96 | 0.06549  | 0.00483 |
|    |     | Frag2 | 91.94 | 86.86 | -0.05081 | 0.79863 |
|    |     | Frag3 | 3.65  | 2.18  | -0.01467 | 0.00080 |
|    | S7  | Frag1 | 1.62  | 6.81  | 0.05187  | 0.00110 |
|    |     | Frag2 | 97.20 | 92.13 | -0.05070 | 0.89551 |
|    |     | Frag3 | 1.18  | 1.06  | -0.00117 | 0.00013 |
|    | S8  | Frag1 | 5.28  | 14.08 | 0.08806  | 0.00743 |
|    |     | Frag2 | 92.09 | 83.59 | -0.08494 | 0.76980 |
|    |     | Frag3 | 2.64  | 2.32  | -0.00311 | 0.00061 |
|    | S9  | Frag1 | 17.63 | 91.39 | 0.73760  | 0.16115 |
|    |     | Frag2 | 80.78 | 8.5   | -0.72283 | 0.06865 |
|    |     | Frag3 | 1.59  | 0.11  | -0.01477 | 0.00002 |
| 4C | S1  | Frag1 | 5.31  | 12.67 | 0.07367  | 0.00673 |
|    |     | Frag2 | 91.11 | 85.22 | -0.05891 | 0.77642 |
|    |     | Frag3 | 3.58  | 2.11  | -0.01477 | 0.00076 |
|    | S7  | Frag1 | 2.80  | 8.66  | 0.05861  | 0.00242 |
|    |     | Frag2 | 95.85 | 90.15 | -0.05691 | 0.86409 |
|    |     | Frag3 | 1.36  | 1.19  | -0.00170 | 0.00016 |

|    |     |       |       |       |          |         |
|----|-----|-------|-------|-------|----------|---------|
|    | S8  | Frag1 | 7.01  | 12.61 | 0.05600  | 0.00884 |
|    |     | Frag2 | 90.51 | 85.22 | -0.05297 | 0.77132 |
|    |     | Frag3 | 2.47  | 2.17  | -0.00303 | 0.00054 |
| 5M | S1  | Frag1 | 24.8  | 22.92 | -0.01898 | 0.05690 |
|    |     | Frag2 | 72.71 | 75.30 | 0.02594  | 0.54754 |
|    |     | Frag3 | 2.47  | 1.77  | -0.00696 | 0.00044 |
|    | S11 | Frag1 | 2.38  | 1.96  | -0.00487 | 0.00045 |
|    |     | Frag2 | 96.79 | 96.59 | 0.00201  | 0.93495 |
|    |     | Frag3 | 0.82  | 1.51  | 0.00689  | 0.00012 |
|    | S24 | Frag1 | 1.32  | 12.86 | 0.11540  | 0.00170 |
|    |     | Frag2 | 97.83 | 82.58 | -0.15256 | 0.80799 |
|    |     | Frag3 | 0.84  | 4.56  | 0.03716  | 0.00039 |
| 5H | S1  | Frag1 | 4.91  | 10.74 | 0.06552  | 0.00450 |
|    |     | Frag2 | 91.32 | 86.71 | -0.04611 | 0.79175 |
|    |     | Frag3 | 4.5   | 2.56  | -0.01941 | 0.00115 |
|    | S7  | Frag1 | 1.52  | 6.59  | 0.05071  | 0.00100 |
|    |     | Frag2 | 96.72 | 91.49 | -0.05235 | 0.88493 |
|    |     | Frag3 | 1.76  | 1.92  | 0.00164  | 0.00034 |
|    | S8  | Frag1 | 5.46  | 14.62 | 0.09168  | 0.00789 |
|    |     | Frag2 | 91.19 | 82.88 | -0.08310 | 0.75580 |
|    |     | Frag3 | 3.35  | 2.5   | -0.00857 | 0.00084 |
|    | S9  | Frag1 | 17.47 | 90.83 | 0.73365  | 0.15866 |
|    |     | Frag2 | 80.72 | 9.00  | -0.71728 | 0.07263 |
|    |     | Frag3 | 1.81  | 0.17  | -0.01637 | 0.00003 |
| 5C | S1  | Frag1 | 5.13  | 12.71 | 0.07577  | 0.00653 |
|    |     | Frag2 | 90.58 | 84.79 | -0.05789 | 0.76807 |
|    |     | Frag3 | 4.28  | 2.50  | -0.01788 | 0.00107 |
|    | S7  | Frag1 | 2.61  | 8.36  | 0.05754  | 0.00218 |
|    |     | Frag2 | 95.35 | 89.58 | -0.05772 | 0.85410 |
|    |     | Frag3 | 2.04  | 2.06  | 0.00018  | 0.00042 |
|    | S8  | Frag1 | 6.58  | 12.43 | 0.05848  | 0.00819 |
|    |     | Frag2 | 90.10 | 85.06 | -0.05043 | 0.76642 |
|    |     | Frag3 | 3.31  | 2.51  | -0.00805 | 0.00083 |
| 6M | S1  | Frag1 | 19.99 | 21.73 | 0.01738  | 0.04345 |
|    |     | Frag2 | 73.71 | 76.24 | 0.02527  | 0.56197 |
|    |     | Frag3 | 6.29  | 2.03  | -0.04266 | 0.00128 |
|    | S9  | Frag1 | 6.95  | 13.22 | 0.06276  | 0.00918 |
|    |     | Frag2 | 83.87 | 82.96 | -0.00918 | 0.69578 |
|    |     | Frag3 | 9.18  | 3.82  | -0.05359 | 0.00351 |
|    | S11 | Frag1 | 4.23  | 3.38  | -0.00850 | 0.00143 |
|    |     | Frag2 | 95.07 | 95.62 | 0.00547  | 0.90909 |
|    |     | Frag3 | 0.70  | 1.00  | 0.00303  | 0.00007 |
|    | S21 | Frag1 | 14.88 | 20.88 | 0.05998  | 0.03108 |
|    |     | Frag2 | 76.43 | 75.14 | -0.01286 | 0.57425 |
|    |     | Frag3 | 8.69  | 3.98  | -0.04712 | 0.00346 |
| 6H | S1  | Frag1 | 3.90  | 11.32 | 0.07424  | 0.00442 |
|    |     | Frag2 | 85.31 | 85.83 | 0.00520  | 0.73219 |
|    |     | Frag3 | 10.79 | 2.85  | -0.07944 | 0.00307 |
|    | S8  | Frag1 | 4.72  | 10.41 | 0.05686  | 0.00491 |
|    |     | Frag2 | 91.86 | 88.17 | -0.03685 | 0.80991 |
|    |     | Frag3 | 3.42  | 1.42  | -0.02001 | 0.00049 |
| 6C | S1  | Frag1 | 4.21  | 12.39 | 0.08185  | 0.00521 |
|    |     | Frag2 | 85.25 | 84.88 | -0.00371 | 0.72366 |

|     |     |       |       |       |          |         |
|-----|-----|-------|-------|-------|----------|---------|
|     |     | Frag3 | 10.54 | 2.73  | -0.07813 | 0.00287 |
|     | S9  | Frag1 | 6.72  | 18.78 | 0.12054  | 0.01263 |
|     |     | Frag2 | 90.37 | 80.10 | -0.10269 | 0.72385 |
|     |     | Frag3 | 2.91  | 1.12  | -0.01785 | 0.00033 |
| 7 M | S1  | Frag1 | 21.34 | 22.67 | 0.01323  | 0.04838 |
|     |     | Frag2 | 73.63 | 75.70 | 0.02075  | 0.55740 |
|     |     | Frag3 | 5.03  | 1.63  | -0.03398 | 0.00082 |
|     | S11 | Frag1 | 4.67  | 4.01  | -0.00664 | 0.00187 |
|     |     | Frag2 | 94.99 | 95.37 | 0.00348  | 0.90590 |
|     |     | Frag3 | 0.34  | 0.62  | 0.00280  | 0.00002 |
|     | S22 | Frag1 | 28.06 | 25.59 | -0.02470 | 0.07181 |
|     |     | Frag2 | 63.35 | 70.06 | 0.06708  | 0.44381 |
|     |     | Frag3 | 8.59  | 4.35  | -0.04237 | 0.00374 |
| 7H  | S1  | Frag1 | 3.98  | 11.70 | 0.07724  | 0.00466 |
|     |     | Frag2 | 87.81 | 86.01 | -0.01800 | 0.75528 |
|     |     | Frag3 | 8.21  | 2.28  | -0.05924 | 0.00187 |
|     | S7  | Frag1 | 3.05  | 18.64 | 0.15591  | 0.00569 |
|     |     | Frag2 | 91.34 | 79.95 | -0.11385 | 0.73029 |
|     |     | Frag3 | 5.61  | 1.4   | -0.04206 | 0.00079 |
|     | S8  | Frag1 | 5.09  | 11.36 | 0.06277  | 0.00578 |
|     |     | Frag2 | 91.39 | 87.30 | -0.04085 | 0.79788 |
|     |     | Frag3 | 3.52  | 1.33  | -0.02193 | 0.00047 |
| 7C  | S1  | Frag1 | 4.28  | 12.82 | 0.08534  | 0.00549 |
|     |     | Frag2 | 87.33 | 84.91 | -0.02418 | 0.74154 |
|     |     | Frag3 | 8.39  | 2.27  | -0.06116 | 0.00190 |
|     | S9  | Frag1 | 7.60  | 21.48 | 0.13879  | 0.01633 |
|     |     | Frag2 | 89.42 | 77.52 | -0.11892 | 0.69317 |
|     |     | Frag3 | 2.98  | 1.00  | -0.01987 | 0.00030 |
| 8M  | S1  | Frag1 | 14.03 | 19.26 | 0.05235  | 0.02702 |
|     |     | Frag2 | 75.10 | 78.04 | 0.02942  | 0.58613 |
|     |     | Frag3 | 10.87 | 2.69  | -0.08177 | 0.00293 |
|     | S12 | Frag1 | 3.91  | 3.66  | -0.00260 | 0.00143 |
|     |     | Frag2 | 95.98 | 95.95 | -0.00214 | 0.92090 |
|     |     | Frag3 | 0.50  | 0.97  | 0.00474  | 0.00005 |
|     | S23 | Frag1 | 2.06  | 1.70  | -0.00361 | 0.00035 |
|     |     | Frag2 | 97.63 | 97.11 | -0.00525 | 0.94803 |
|     |     | Frag3 | 0.31  | 1.19  | 0.00886  | 0.00004 |
| 8H  | S1  | Frag1 | 2.78  | 10.54 | 0.07761  | 0.00293 |
|     |     | Frag2 | 81.25 | 85.99 | 0.04733  | 0.69867 |
|     |     | Frag3 | 15.97 | 3.47  | -0.12499 | 0.00554 |
|     | S9  | Frag1 | 3.05  | 7.37  | 0.04315  | 0.00225 |
|     |     | Frag2 | 95.50 | 91.76 | -0.03739 | 0.87637 |
|     |     | Frag3 | 1.45  | 0.87  | -0.00576 | 0.00013 |
| 8C  | S1  | Frag1 | 3.30  | 12.52 | 0.09222  | 0.00413 |
|     |     | Frag2 | 81.02 | 84.04 | 0.03019  | 0.68094 |
|     |     | Frag3 | 15.68 | 3.44  | -0.12241 | 0.00539 |
|     | S9  | Frag1 | 5.25  | 10.34 | 0.05188  | 0.00533 |
|     |     | Frag2 | 93.56 | 88.91 | -0.04650 | 0.83179 |
|     |     | Frag3 | 1.29  | 0.75  | -0.00538 | 0.00100 |
| 9M  | S1  | Frag1 | 9.87  | 17.23 | 0.07360  | 0.01700 |
|     |     | Frag2 | 69.74 | 78.40 | 0.08659  | 0.54671 |

|    |     |       |       |       |          |         |
|----|-----|-------|-------|-------|----------|---------|
|    |     | Frag3 | 20.39 | 4.38  | -0.16019 | 0.00892 |
| 9H | S1  | Frag1 | 2.35  | 10.16 | 0.07809  | 0.00239 |
|    |     | Frag2 | 72.19 | 84.17 | 0.11983  | 0.60767 |
|    |     | Frag3 | 25.46 | 5.67  | -0.19792 | 0.01443 |
|    | S9  | Frag1 | 2.64  | 9.51  | 0.06870  | 0.00251 |
|    |     | Frag2 | 95.80 | 89.45 | -0.06345 | 0.85698 |
|    |     | Frag3 | 1.56  | 1.03  | -0.00525 | 0.00016 |
| 9C | S1  | Frag1 | 2.42  | 11.52 | 0.09098  | 0.00279 |
|    |     | Frag2 | 71.96 | 83.19 | 0.11226  | 0.59863 |
|    |     | Frag3 | 25.62 | 5.30  | -0.20323 | 0.01357 |
|    | S10 | Frag1 | 3.22  | 19.12 | 0.15903  | 0.00615 |
|    |     | Frag2 | 92.18 | 79.75 | -0.12423 | 0.73514 |
|    |     | Frag3 | 4.61  | 1.13  | -0.03479 | 0.00052 |

**Table S7.** Intrinsic charge transfer percentage, CT(%), Intrinsic local excitation percentage, LE(%) and Transferred electrons between fragments, calculated for the electronic transition  $S_{0 \rightarrow i}$  of the iM, iH and iC compounds at the CAM-B3LYP/6-31G(d,p)/IEFPCM Level in tetrahydrofuran

|    | S <sub>n</sub> | CT(%)  | LE(%)  | Transferred electrons between fragments |                 |                     |
|----|----------------|--------|--------|-----------------------------------------|-----------------|---------------------|
| 1M | S1             | 41.339 | 58.661 | 1 -> 2: 0.22802                         | 1 <- 2: 0.15225 | Net 1->2: 0.07577   |
|    |                |        |        | 1 -> 3: 0.00667                         | 1 <- 3: 0.00255 | Net 1->3: 0.00411   |
|    |                |        |        | 2 -> 3: 0.01519                         | 2 <- 3: 0.00871 | Net 2->3: 0.00648   |
|    | S11            | 4.333  | 95.667 | 1-> 2: 0.01347                          | 1<- 2: 0.02001  | Net 1->2: -0.00655  |
|    |                |        |        | 1 -> 3: 0.00007                         | 1 <- 3: 0.00010 | Net 1->3: -0.00003  |
|    |                |        |        | 2 -> 3: 0.00496                         | 2 <- 3: 0.00471 | Net 2->3: 0.00025   |
| 1H | S1             | 18.80  | 81.199 | 1 -> 2: 0.04645                         | 1<- 2: 0.08631  | Net 1->2: -0.03986  |
|    |                |        |        | 1 -> 3: 0.00176                         | 1 <- 3: 0.00223 | Net 1->3: -0.00047  |
|    |                |        |        | 2 -> 3: 0.03048                         | 2 <- 3: 0.02079 | Net 2->3: 0.00969   |
|    | S7             | 7.988  | 92.012 | 1 -> 2: 0.01770                         | 1<- 2: 0.05170  | Net 1->2: -0.03400  |
|    |                |        |        | 1 -> 3: 0.00011                         | 1 <- 3: 0.00025 | Net 1->3: -0.00014  |
|    |                |        |        | 2 -> 3: 0.00572                         | 2 <- 3: 0.00440 | Net 2->3: 0.00133   |
| 1C | S1             | 20.577 | 79.423 | 1 -> 2: 0.05431                         | 1<- 2: 0.09672  | Net 1->2: -0.04242  |
|    |                |        |        | 1 -> 3: 0.00205                         | 1 <- 3: 0.00252 | Net 1->3: -0.00048  |
|    |                |        |        | 2 -> 3: 0.02964                         | 2 <- 3: 0.02053 | Net 2->3: 0.00911   |
|    | S7             | 10.73  | 89.266 | 1 -> 2: 0.03156                         | 1<- 2: 0.06572  | Net 1->2: -0.03417  |
|    |                |        |        | 1 -> 3: 0.00018                         | 1 <- 3: 0.00032 | Net 1->3: -0.00014  |
|    |                |        |        | 2 -> 3: 0.00518                         | 2 <- 3: 0.00438 | Net 2->3: 0.00080   |
|    | S1             | 40.98  | 59.019 | 1 -> 2: 0.20538                         | 1<- 2: 0.17603  | Net 1->2: 0.02935   |
|    |                |        |        | 1 -> 3: 0.00290                         | 1 <- 3: 0.00459 | Net 1->3: -0.00170  |
|    |                |        |        | 2 -> 3: 0.00734                         | 2 <- 3: 0.01358 | Net 2->3: -0.00624  |
|    | S11            | 6.274  | 96.006 | 1 -> 2: 0.03280                         | 1<- 2: 0.02480  | Net 1->2: 0.00800   |
|    |                |        |        | 1 -> 3: 0.00012                         | 1 <- 3: 0.00004 | Net 1->3: 0.00008   |
|    |                |        |        | 2 -> 3: 0.00344                         | 2 <- 3: 0.00154 | Net 2->3: 0.00190   |
| 2H | S1             | 24.459 | 80.858 | 1 -> 2: 0.07528                         | 1<- 2: 0.11672  | Net 1->2: -0.04144  |
|    |                |        |        | 1 -> 3: 0.00134                         | 1 <- 3: 0.00474 | Net 1->3: -0.00340  |
|    |                |        |        | 2 -> 3: 0.01416                         | 2 <- 3: 0.03236 | Net 2->3: -0.01820  |
|    | S7             | 8.757  | 91.243 | 1 -> 2: 0.01514                         | 1<- 2: 0.06213  | Net 1->2: -0.04699  |
|    |                |        |        | 1 -> 3: 0.00005                         | 1 <- 3: 0.00048 | Net 1->3: -0.00043  |
|    |                |        |        | 2 -> 3: 0.00281                         | 2 <- 3: 0.00697 | Net 2->3: -0.00416  |
|    | S8             | 22.308 | 77.692 | 1 -> 2: 0.05080                         | 1<- 2: 0.12587  | Net 1-> 2: -0.07507 |
|    |                |        |        | 1 -> 3: 0.00089                         | 1 <- 3: 0.00451 | Net 1->3: -0.00361  |
|    |                |        |        | 2 -> 3: 0.01351                         | 2 <- 3: 0.02749 | Net 2->3: -0.01398  |
| 2C | S1             | 22.02  | 77.972 | 1 -> 2: 0.04959                         | 1<- 2: 0.11943  | Net 1->2: -0.06984  |
|    |                |        |        | 1 -> 3: 0.00089                         | 1 <- 3: 0.00489 | Net 1->3: -0.00400  |
|    |                |        |        | 2 -> 3: 0.01306                         | 2 <- 3: 0.03162 | Net 2->3: -0.01776  |
|    | S7             | 12.872 | 88.329 | 1 -> 2: 0.03430                         | 1<- 2: 0.08244  | Net 1->2: -0.04814  |
|    |                |        |        | 1 -> 3: 0.00012                         | 1 <- 3: 0.00075 | Net 1->3: -0.00063  |
|    |                |        |        | 2 -> 3: 0.00307                         | 2<- 3: 0.00804  | Net 2->3: -0.00497  |
|    | S8             | 22.794 | 77.206 | 1 -> 2: 0.06727                         | 1 <- 2: 0.11617 | Net 1->2: -0.04890  |
|    |                |        |        | 1 -> 3: 0.00112                         | 1 <- 3: 0.00407 | Net 1->3: -0.00295  |
|    |                |        |        | 2 -> 3: 0.01265                         | 2 <- 3: 0.02665 | Net 2->3: -0.01400  |
| 3M | S1             | 39.778 | 60.222 | 1 -> 2: 0.21034                         | 1<- 2: 0.17690  | Net 1->2: 0.03344   |
|    |                |        |        | 1 -> 3: 0.00164                         | 1 <- 3: 0.00118 | Net 1->3: 0.00046   |
|    |                |        |        | 2 -> 3: 0.00415                         | 2 <- 3: 0.00356 | Net 2->3: 0.00059   |
|    | S11            | 4.361  | 95.639 | 1 -> 2: 0.02185                         | 1 <- 2: 0.01863 | Net 1->2: 0.00322   |

|    |     |        |        |                                                       |                                                       |                                                                |
|----|-----|--------|--------|-------------------------------------------------------|-------------------------------------------------------|----------------------------------------------------------------|
|    |     |        |        | 1 -> 3: 0.00005<br>2 -> 3: 0.00224                    | 1 <- 3: 0.00002<br>2 <- 3: 0.00082                    | Net 1->3: 0.00004<br>Net 2->3: 0.00142                         |
|    | S14 | 22.139 | 77.861 | 1 -> 2: 0.16187<br>1 -> 3: 0.00072<br>2 -> 3: 0.00340 | 1 <- 2: 0.04986<br>1 <- 3: 0.00034<br>2 <- 3: 0.00521 | Net 1->2: 0.11202<br>Net 1->3: 0.00038<br>Net 2->3: -0.00180   |
|    | S23 | 43.005 | 56.995 | 1 -> 2: 0.26611<br>1 -> 3: 0.00465<br>2 -> 3: 0.00857 | 1 <- 2: 0.14619<br>1 <- 3: 0.00104<br>2 <- 3: 0.00349 | Net 1->2: 0.11993<br>Net 1->3: 0.00361<br>Net 2->3: 0.00508    |
| 3H | S1  | 16.740 | 83.260 | 1 -> 2: 0.04510<br>1 -> 3: 0.00044<br>2 -> 3: 0.00807 | 1 <- 2: 0.10463<br>1 <- 3: 0.00103<br>2 <- 3: 0.00813 | Net 1->2: -0.05954<br>Net 1->3: -0.00059<br>Net 2->3: -0.00006 |
|    | S7  | 7.652  | 92.348 | 1 -> 2: 0.01489<br>1 -> 3: 0.00004<br>2 -> 3: 0.00223 | 1 <- 2: 0.05751<br>1 <- 3: 0.00011<br>2 <- 3: 0.00175 | Net 1->2: -0.04262<br>Net 1->3: -0.00007<br>Net 2->3: 0.00048  |
| 3C | S1  | 19.081 | 81.231 | 1 -> 2: 0.05260<br>1 -> 3: 0.00052<br>2 -> 3: 0.00796 | 1 <- 2: 0.12067<br>1 <- 3: 0.00118<br>2 <- 3: 0.00788 | Net 1->2: -0.06807<br>Net 1->3: -0.00066<br>Net 2->3: 0.00008  |
|    | S7  | 10.391 | 89.609 | 1 -> 2: 0.02627<br>1 -> 3: 0.00007<br>2 -> 3: 0.00225 | 1 <- 2: 0.07329<br>1 <- 3: 0.00015<br>2 <- 3: 0.00189 | Net 1->2: -0.04702<br>Net 1->3: -0.00009<br>Net 2->3: 0.00036  |
|    | S8  | 19.324 | 80.676 | 1 -> 2: 0.06062<br>1 -> 3: 0.00067<br>2 -> 3: 0.00880 | 1 <- 2: 0.11581<br>1 <- 3: 0.00093<br>2 <- 3: 0.00640 | Net 1->2: -0.05519<br>Net 1->3: -0.00026<br>Net 2->3: 0.00240  |
| 4M | S1  | 39.132 | 60.868 | 1 -> 2: 0.18878<br>1 -> 3: 0.00391<br>2 -> 3: 0.01141 | 1 <- 2: 0.16803<br>1 <- 3: 0.00448<br>2 <- 3: 0.01469 | Net 1->2: 0.02075<br>Net 1->3: -0.00057<br>Net 2->3: -0.00328  |
|    | S11 | 5.247  | 94.753 | 1 -> 2: 0.02241<br>1 -> 3: 0.00020<br>2 -> 3: 0.00862 | 1 <- 2: 0.01837<br>1 <- 3: 0.00005<br>2 <- 3: 0.00281 | Net 1->2: 0.00404<br>Net 1->3: 0.00015<br>Net 2->3: 0.00581    |
|    | S24 | 56.385 | 43.615 | 1 -> 2: 0.47134<br>1 -> 3: 0.01201<br>2 -> 3: 0.00243 | 1 <- 2: 0.06893<br>1 <- 3: 0.00384<br>2 <- 3: 0.00531 | Net 1->2: 0.40241<br>Net 1->3: 0.00817<br>Net 2->3: -0.00288   |
| 4H | S1  | 19.574 | 80.426 | 1 -> 2: 0.03828<br>1 -> 3: 0.00096<br>2 -> 3: 0.02006 | 1 <- 2: 0.10073<br>1 <- 3: 0.00400<br>2 <- 3: 0.03170 | Net 1->2: -0.06245<br>Net 1->3: -0.00304<br>Net 2->3: -0.01164 |
|    | S7  | 10.326 | 89.674 | 1 -> 2: 0.01492<br>1 -> 3: 0.00017<br>2 -> 3: 0.01033 | 1 <- 2: 0.06616<br>1 <- 3: 0.00080<br>2 <- 3: 0.01087 | Net 1->2: -0.05124<br>Net 1->3: -0.00063<br>Net 2->3: -0.00054 |
|    | S8  | 22.215 | 77.785 | 1 -> 2: 0.04411<br>1 -> 3: 0.00123<br>2 -> 3: 0.02140 | 1 <- 2: 0.12968<br>1 <- 3: 0.00371<br>2 <- 3: 0.02203 | Net 1->2: -0.08557<br>Net 1->3: -0.00248<br>Net 2->3: -0.00063 |
|    | S9  | 77.019 | 22.981 | 1 -> 2: 0.01498<br>1 -> 3: 0.00019<br>2 -> 3: 0.00089 | 1 <- 2: 0.73828<br>1 <- 3: 0.01450<br>2 <- 3: 0.00135 | Net 1->2: -0.72329<br>Net 1->3: -0.01431<br>Net 2->3: -0.00046 |
| 4C | S1  | 21.610 | 78.390 | 1 -> 2: 0.04522<br>1 -> 3: 0.00112<br>2 -> 3: 0.01920 | 1 <- 2: 0.11547<br>1 <- 3: 0.00454<br>2 <- 3: 0.03054 | Net 1->2: -0.07025<br>Net 1->3: -0.00342<br>Net 2->3: -0.01134 |
|    | S7  | 13.333 | 86.667 | 1 -> 2: 0.02521<br>1 -> 3: 0.00033<br>2 -> 3: 0.01139 | 1 <- 2: 0.08267<br>1 <- 3: 0.00118<br>2 <- 3: 0.01225 | Net 1->2: -0.05776<br>Net 1->3: -0.00084<br>Net 2->3: -0.00085 |
|    | S8  | 21.930 | 78.070 | 1 -> 2: 0.05975<br>1 -> 3: 0.00152<br>2 -> 3: 0.01966 | 1 <- 2: 0.11415<br>1 <- 3: 0.00312<br>2 <- 3: 0.02109 | Net 1->2: -0.05440<br>Net 1->3: -0.00160<br>Net 2->3: -0.00143 |
| 5M | S1  | 39.512 | 60.488 | 1 -> 2: 0.18691                                       | 1 <- 2: 0.16667                                       | Net 1->2: 0.02024                                              |

|    |     |        |        |                                                       |                                                       |                                                                |
|----|-----|--------|--------|-------------------------------------------------------|-------------------------------------------------------|----------------------------------------------------------------|
|    |     |        |        | 1 -> 3: 0.00440<br>2 -> 3: 0.01289                    | 1 <- 3: 0.00566<br>2 <- 3: 0.01859                    | Net 1->3: -0.00126<br>Net 2->3: -0.00570                       |
|    | S11 | 6.447  | 93.553 | 1 -> 2: 0.02303<br>1 -> 3: 0.00036<br>2 -> 3: 0.01462 | 1 <- 2: 0.01836<br>1 <- 3: 0.00016<br>2 <- 3: 0.00794 | Net 1->2: 0.00467<br>Net 1->3: 0.00020<br>Net 2->3: 0.00668    |
|    | S24 | 19.002 | 80.998 | 1 -> 2: 0.01091<br>1 -> 3: 0.00060<br>2 -> 3: 0.04462 | 1 <- 2: 0.12583<br>1 <- 3: 0.00109<br>2 <- 3: 0.00697 | Net 1->2: -0.11492<br>Net 1->3: -0.00048<br>Net 2->3: 0.03764  |
| 5H | S1  | 20.260 | 79.740 | 1 -> 2: 0.03631<br>1 -> 3: 0.00107<br>2 -> 3: 0.02334 | 1 <- 2: 0.09807<br>1 <- 3: 0.00483<br>2 <- 3: 0.03899 | Net 1->2: -0.06176<br>Net 1->3: -0.00376<br>Net 2->3: -0.01565 |
|    | S7  | 11.373 | 88.627 | 1 -> 2: 0.01388<br>1 -> 3: 0.00029<br>2 -> 3: 0.01858 | 1 <- 2: 0.06373<br>1 <- 3: 0.00116<br>2 <- 3: 0.01608 | Net 1->2: -0.04985<br>Net 1->3: -0.00087<br>Net 2->3: -0.00250 |
|    | S8  | 23.538 | 76.462 | 1 -> 2: 0.04522<br>1 -> 3: 0.00136<br>2 -> 3: 0.02275 | 1 <- 2: 0.13336<br>1 <- 3: 0.00490<br>2 <- 3: 0.02779 | Net1-> 2: -0.08813<br>Net 1->3: -0.00354<br>Net 2->3: -0.00503 |
|    | S9  | 23.132 | 76.868 | 1 -> 2: 0.01572<br>1 -> 3: 0.00030<br>2 -> 3: 0.00138 | 1 <-2: 0.73324<br>1 <-3: 0.01642<br>2 <-3: 0.00163    | Net 1->2: -0.71752<br>Net 1->3: -0.01613<br>Net 2->3: -0.00025 |
| 5C | S1  | 22.433 | 77.567 | 1 -> 2: 0.04353<br>1 -> 3: 0.00128<br>2 -> 3: 0.02261 | 1 <- 2: 0.11514<br>1 <- 3: 0.00545<br>2 <- 3: 0.03633 | Net1-> 2: -0.07161<br>Net1-> 3: -0.00416<br>Net 2->3: -0.01371 |
|    | S7  | 14.330 | 85.670 | 1 -> 2: 0.02337<br>1 -> 3: 0.00054<br>2 -> 3: 0.01964 | 1 <- 2: 0.07974<br>1 <- 3: 0.00171<br>2 <- 3: 0.01829 | Net 1->2: -0.05637<br>Net 1->3: -0.00117<br>Net 2->3: 0.00135  |
|    | S8  | 22.456 | 77.544 | 1 -> 2: 0.05601<br>1 -> 3: 0.00165<br>2 -> 3: 0.02259 | 1 <- 2: 0.11202<br>1 <- 3: 0.00412<br>2 <- 3: 0.02817 | Net 1->2: -0.05601<br>Net 1->3: -0.00247<br>Net 2->3: -0.00558 |
| 6M | S1  | 39.330 | 60.670 | 1 -> 2: 0.15243<br>1 -> 3: 0.00406<br>2 -> 3: 0.01496 | 1 <- 2: 0.16019<br>1 <- 3: 0.01368<br>2 <- 3: 0.04799 | Net 1->2: -0.00776<br>Net 1->3: -0.00962<br>Net 2->3: -0.03303 |
|    | S9  | 29.152 | 70.848 | 1 -> 2: 0.05762<br>1 -> 3: 0.00265<br>2 -> 3: 0.03205 | 1 <- 2: 0.11090<br>1 <- 3: 0.01214<br>2 <- 3: 0.07616 | Net 1->2: -0.05328<br>Net 1->3: -0.00948<br>Net 2->3: -0.04410 |
|    | S11 | 8.942  | 91.058 | 1 -> 2: 0.04040<br>1 -> 3: 0.00042<br>2 -> 3: 0.00955 | 1 <- 2: 0.03209<br>1 <- 3: 0.00024<br>2 <- 3: 0.00671 | Net 1->2: 0.00831<br>Net 1->3: 0.00019<br>Net 2->3: 0.00284    |
|    | S21 | 39.121 | 60.879 | 1 -> 2: 0.11183<br>1 -> 3: 0.00592<br>2 -> 3: 0.03041 | 1 <- 2: 0.15959<br>1 <- 3: 0.01815<br>2 <- 3: 0.06531 | Net 1->2: -0.04776<br>Net 1->3: -0.01223<br>Net 2->3: -0.03489 |
| 6H | S1  | 26.032 | 73.968 | 1 -> 2: 0.03348<br>1 -> 3: 0.00111<br>2 -> 3: 0.02429 | 1 <- 2: 0.09661<br>1 <- 3: 0.01222<br>2 <- 3: 0.09262 | Net 1->2: -0.06313<br>Net 1->3: -0.01111<br>Net 2->3: -0.06833 |
|    | S8  | 18.469 | 81.531 | 1 -> 2: 0.04163<br>1 -> 3: 0.00067<br>2 -> 3: 0.01305 | 1 <- 2: 0.09561<br>1 <- 3: 0.00356<br>2 <- 3: 0.03017 | Net 1->2: -0.05397<br>Net 1->3: -0.00289<br>Net 2->3: -0.01712 |
| 6C | S1  | 26.825 | 73.175 | 1 -> 2: 0.03571<br>1 -> 3: 0.00115<br>2 -> 3: 0.02324 | 1 <- 2: 0.10564<br>1 <- 3: 0.01306<br>2 <- 3: 0.08946 | Net 1->2: -0.06993<br>Net 1->3: -0.01191<br>Net 2->3: -0.06622 |
|    | S9  | 26.320 | 73.680 | 1 -> 2: 0.05386<br>1 -> 3: 0.00076<br>2 -> 3: 0.01015 | 1 <- 2: 0.16969<br>1 <- 3: 0.00546<br>2 <- 3: 0.02329 | Net 1->2: -0.11383<br>Net 1->3: -0.00470<br>Net 2->3: -0.01314 |
| 7M | S1  | 39.340 | 60.660 | 1->2: 0.16158                                         | 1 <- 2: 0.16689                                       | Net 1->2: -0.00531                                             |

|    |     |        |        |                                                       |                                                       |                                                                |
|----|-----|--------|--------|-------------------------------------------------------|-------------------------------------------------------|----------------------------------------------------------------|
|    |     |        |        | 1->3: 0.00348<br>2->3: 0.01200                        | 1 <- 3: 0.01139<br>2 <- 3: 0.03806                    | Net 1->3: -0.00792<br>Net 2->3: -0.02606                       |
|    | S11 | 9.220  | 90.780 | 1-> 2: 0.04458<br>1-> 3: 0.00029<br>2-> 3: 0.00588    | 1 <- 2: 0.03809<br>1 <- 3: 0.00014<br>2 <- 3: 0.00323 | Net 1->2: 0.00649<br>Net 1->3: 0.00015<br>Net 2->3: 0.00265    |
|    | S22 | 48.064 | 51.936 | 1-> 2: 0.19659<br>1-> 3: 0.01221<br>2-> 3: 0.02757    | 1 <- 2: 0.16212<br>1 <- 3: 0.02198<br>2 <- 3: 0.06017 | Net 1->2: 0.03447<br>Net 1->3: -0.00977<br>Net 2->3: -0.03260  |
| 7H | S1  | 23.819 | 76.181 | 1 -> 2: 0.03424<br>1 -> 3: 0.00091<br>2-> 3: 0.02005  | 1 <- 2: 0.10278<br>1 <- 3: 0.00961<br>2 <- 3: 0.07059 | Net 1->2: -0.06854<br>Net 1->3: -0.00870<br>Net 2->3: -0.05054 |
| 7C | S1  | 25.106 | 74.894 | 1 -> 2: 0.03637<br>1 -> 3: 0.00097<br>2 -> 3: 0.01983 | 1 <- 2: 0.11193<br>1 <- 3: 0.01075<br>2 <- 3: 0.07121 | Net 1->2: -0.07556<br>Net 1->3: -0.00978<br>Net 2->3: -0.05138 |
|    | S9  | 29.020 | 70.980 | 1 -> 2: 0.05893<br>1 -> 3: 0.00076<br>2 -> 3: 0.00891 | 1 <- 2: 0.19207<br>1 <- 3: 0.00641<br>2 <- 3: 0.02313 | Net 1->2: -0.13314<br>Net 1->3: -0.00565<br>Net 2->3: -0.01422 |
| 8M | S1  | 38.392 | 61.608 | 1 -> 2: 0.10948<br>1 -> 3: 0.00378<br>2 -> 3: 0.02023 | 1 <- 2: 0.14467<br>1 <- 3: 0.02094<br>2 <- 3: 0.08483 | Net 1->2: -0.03519<br>Net 1->3: -0.01716<br>Net 2->3: -0.06461 |
|    | S12 | 8.684  | 91.316 | 1 -> 2: 0.03735<br>1 -> 3: 0.00038<br>2 -> 3: 0.00926 | 1 <- 2: 0.03499<br>1 <- 3: 0.00018<br>2 <- 3: 0.00472 | Net 1->2: 0.00232<br>Net 1->3: 0.00020<br>Net 2->3: 0.00453    |
|    | S23 | 5.158  | 94.842 | 1 -> 2: 0.02004<br>1 -> 3: 0.00025<br>2 -> 3: 0.01165 | 1 <- 2: 0.01662<br>1 <- 3: 0.00005<br>2 <- 3: 0.00298 | Net 1->2: 0.00342<br>Net 1->3: 0.00019<br>Net 2->3: 0.00867    |
| 8H | S1  | 29.286 | 70.714 | 1 -> 2: 0.02390<br>1 -> 3: 0.00096<br>2 -> 3: 0.02820 | 1 <- 2: 0.08565<br>1 <- 3: 0.01683<br>2 <- 3: 0.13732 | Net 1->2: -0.06174<br>Net 1->3: -0.01587<br>Net 2->3: -0.10912 |
|    | S9  | 12.125 | 87.875 | 1 -> 2: 0.02799<br>1 -> 3: 0.00027<br>2 -> 3: 0.00831 | 1 <- 2: 0.07035<br>1 <- 3: 0.00107<br>2 <- 3: 0.01327 | Net 1->2: -0.04235<br>Net 1->3: -0.00080<br>Net 2->3: -0.00496 |
| 8C | S1  | 30.954 | 69.046 | 1 -> 2: 0.02770<br>1 -> 3: 0.00113<br>2 -> 3: 0.02787 | 1 <- 2: 0.10142<br>1 <- 3: 0.01963<br>2 <- 3: 0.13179 | Net 1->2: -0.07372<br>Net 1->3: -0.01849<br>Net 2->3: -0.10392 |
|    | S9  | 16.278 | 83.72  | 1 -> 2: 0.02685<br>1 -> 3: 0.00012<br>2 -> 3: 0.00395 | 1 <- 2: 0.07177<br>1 <- 3: 0.00080<br>2 <- 3: 0.00983 | Net 1->2: -0.04492<br>Net 1->3: -0.00068<br>Net 2->3: -0.00587 |
| 9M | S1  | 42.736 | 57.264 | 1 -> 2: 0.07737<br>1 -> 3: 0.00432<br>2 -> 3: 0.03051 | 1 <- 2: 0.12015<br>1 <- 3: 0.03514<br>2 <- 3: 0.15988 | Net 1->2: -0.04278<br>Net 1->3: -0.03082<br>Net 2->3: -0.12937 |
| 9H | S1  | 37.551 | 62.449 | 1 -> 2: 0.01977<br>1 -> 3: 0.00133<br>2 -> 3: 0.04092 | 1 <- 2: 0.07333<br>1 <- 3: 0.02586<br>2 <- 3: 0.21431 | Net 1->2: -0.05336<br>Net 1->3: -0.02453<br>Net 2->3: -0.17339 |
|    | S9  | 14.034 | 85.966 | 1 -> 2: 0.02365<br>1 -> 3: 0.00027<br>2 -> 3: 0.00988 | 1 <- 2: 0.09114<br>1 <- 3: 0.00148<br>2 <- 3: 0.01392 | Net 1->2: -0.06749<br>Net 1->3: -0.00121<br>Net 2->3: -0.00404 |
| 9C | S1  | 38.502 | 61.498 | 1 -> 2: 0.02013<br>1 -> 3: 0.00128<br>2 -> 3: 0.03811 | 1 <- 2: 0.08288<br>1 <- 3: 0.02951<br>2 <- 3: 0.21311 | Net 1->2: -0.06275<br>Net 1->3: -0.02822<br>Net 2->3: -0.17501 |
|    | S10 | 25.819 | 74.181 | 1 -> 2: 0.02566<br>1 -> 3: 0.00036<br>2 -> 3: 0.01039 | 1 <- 2: 0.17624<br>1 <- 3: 0.00881<br>2 <- 3: 0.03674 | Net 1->2: -0.15058<br>Net 1->3: -0.00844<br>Net 2->3: -0.02635 |

**Table S8.** Calculated dynamic polarizability ( $\alpha$ ) and polarizability anisotropy ( $\Delta\alpha$ )

|    | polarizability ( $\alpha$ ) |      |      |     | polarizability anisotropy ( $\Delta\alpha$ ) |      |      |     |
|----|-----------------------------|------|------|-----|----------------------------------------------|------|------|-----|
|    | 1906                        | 1340 | 1064 | 556 | 1906                                         | 1340 | 1064 | 556 |
| 1M | 249                         | 250  | 252  | 270 | 267                                          | 266  | 270  | 310 |
| 1H | 290                         | 292  | 293  | 306 | 216                                          | 219  | 222  | 246 |
| 1C | 348                         | 349  | 351  | 365 | 203                                          | 205  | 208  | 232 |
| 2M | 235                         | 236  | 238  | 254 | 249                                          | 252  | 256  | 292 |
| 2H | 277                         | 278  | 280  | 292 | 204                                          | 207  | 209  | 232 |
| 2C | 334                         | 336  | 338  | 351 | 190                                          | 192  | 195  | 218 |
| 3M | 234                         | 236  | 238  | 254 | 248                                          | 252  | 256  | 291 |
| 3H | 276                         | 278  | 279  | 291 | 204                                          | 206  | 209  | 231 |
| 3C | 334                         | 336  | 337  | 351 | 189                                          | 192  | 194  | 217 |
| 4M | 251                         | 253  | 255  | 273 | 270                                          | 274  | 278  | 319 |
| 4H | 293                         | 294  | 296  | 310 | 225                                          | 227  | 231  | 257 |
| 4C | 351                         | 352  | 354  | 370 | 211                                          | 214  | 217  | 244 |
| 5M | 289                         | 291  | 294  | 313 | 289                                          | 293  | 298  | 342 |
| 5H | 331                         | 333  | 334  | 349 | 244                                          | 246  | 250  | 279 |
| 5C | 389                         | 389  | 393  | 409 | 231                                          | 231  | 238  | 267 |
| 6M | 258                         | 260  | 262  | 282 | 284                                          | 288  | 293  | 338 |
| 6H | 300                         | 310  | 303  | 318 | 237                                          | 240  | 243  | 273 |
| 6C | 358                         | 360  | 361  | 378 | 227                                          | 229  | 233  | 264 |
| 7M | 243                         | 244  | 247  | 265 | 267                                          | 271  | 276  | 318 |
| 7H | 284                         | 286  | 288  | 302 | 220                                          | 223  | 226  | 253 |
| 7C | 343                         | 344  | 346  | 342 | 209                                          | 212  | 215  | 209 |
| 8M | 253                         | 255  | 257  | 279 | 291                                          | 295  | 302  | 352 |
| 8H | 295                         | 297  | 299  | 315 | 247                                          | 250  | 254  | 290 |
| 8C | 353                         | 355  | 357  | 376 | 234                                          | 237  | 241  | 278 |
| 9M | 286                         | 289  | 292  | 318 | 328                                          | 333  | 340  | 406 |
| 9H | 327                         | 329  | 332  | 353 | 279                                          | 284  | 289  | 337 |
| 9C | 386                         | 389  | 391  | 415 | 271                                          | 276  | 281  | 332 |

## List of Figures

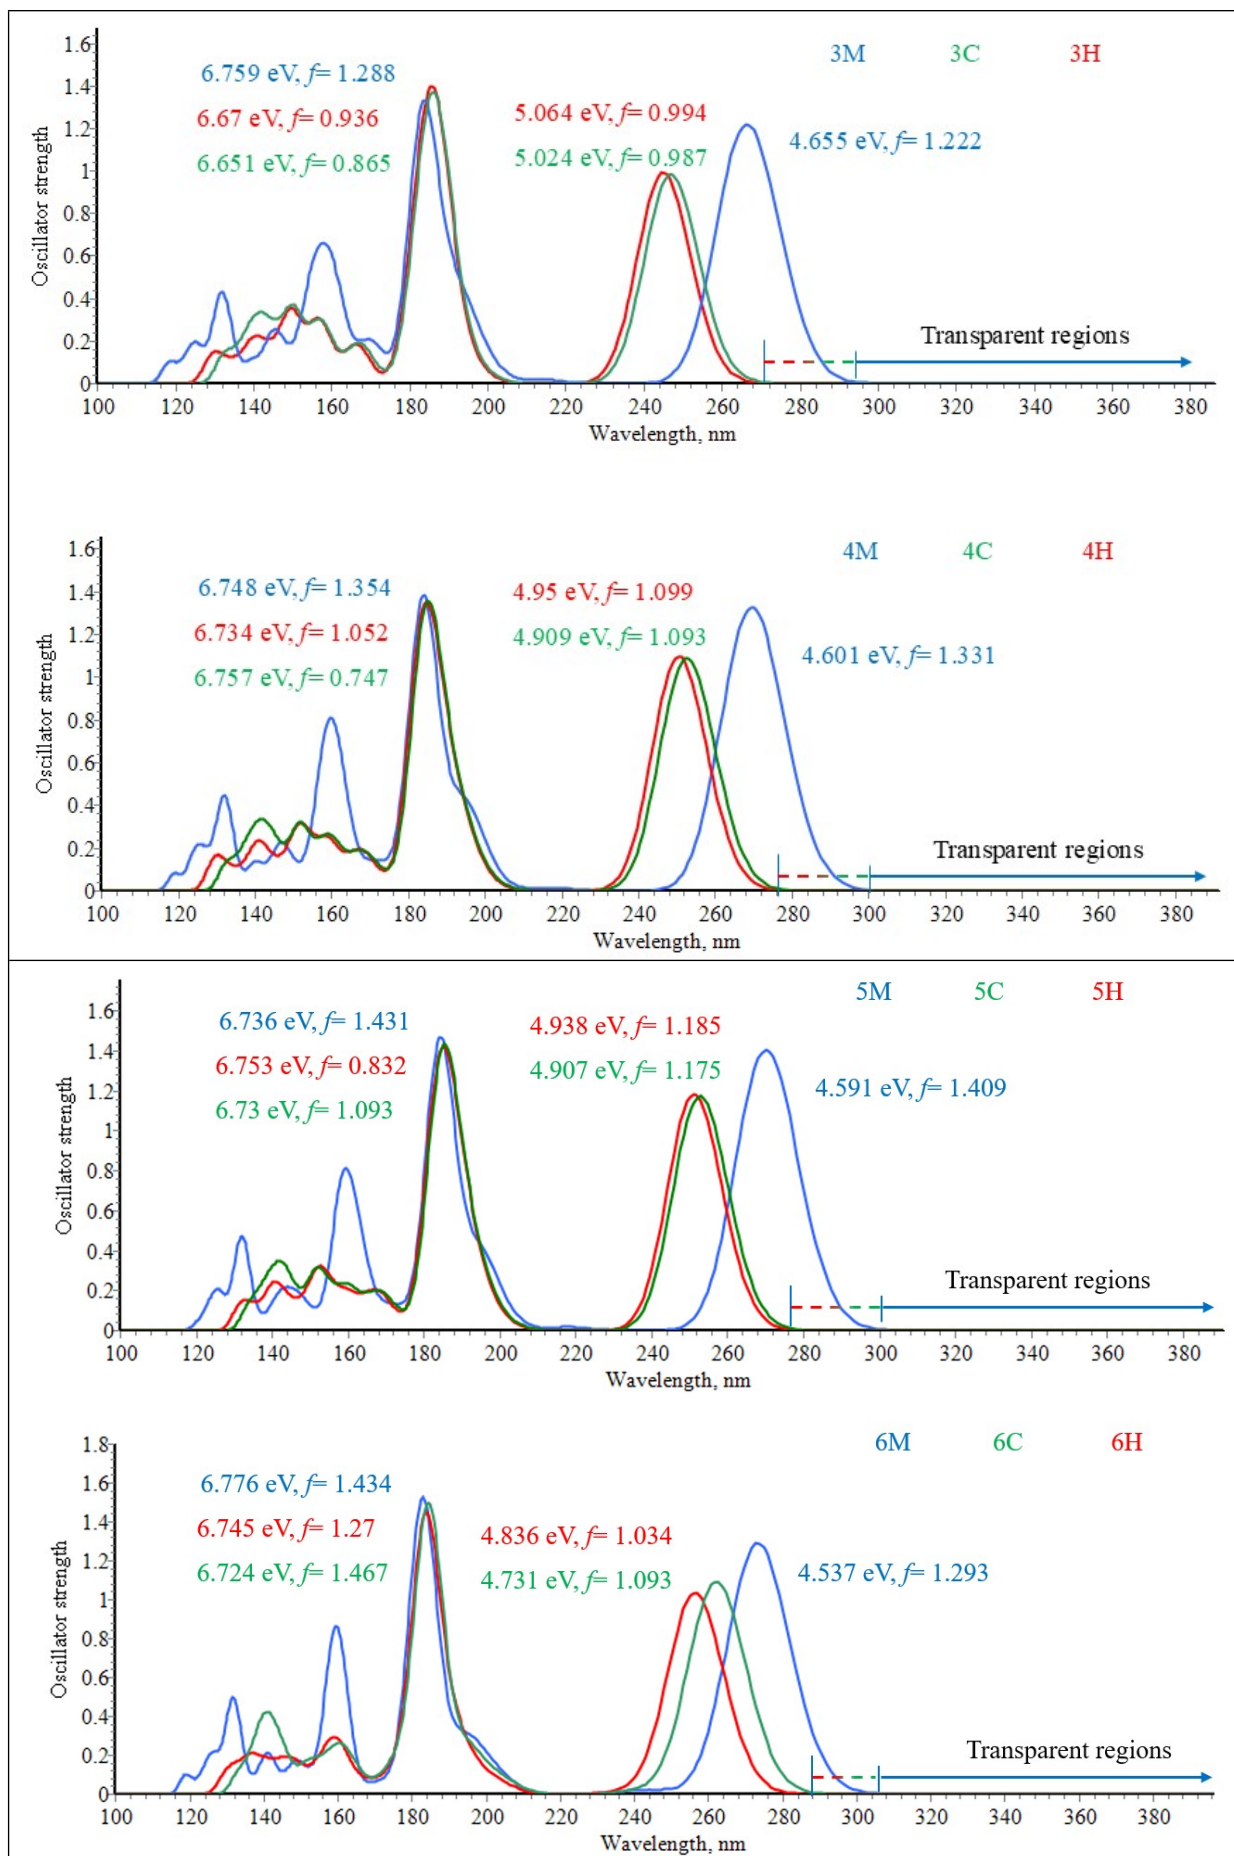

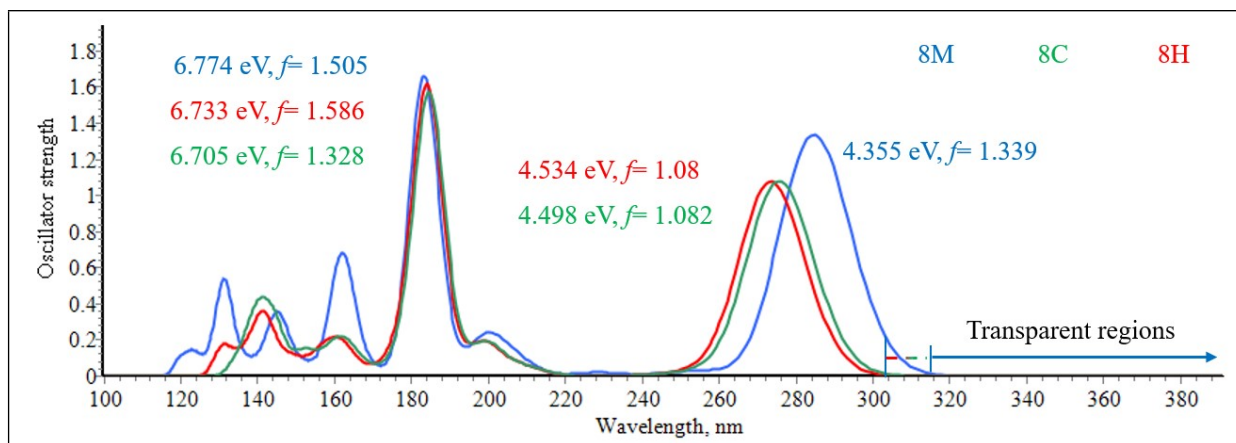

**Figure S1.** Simulated absorption spectrum of the title compounds

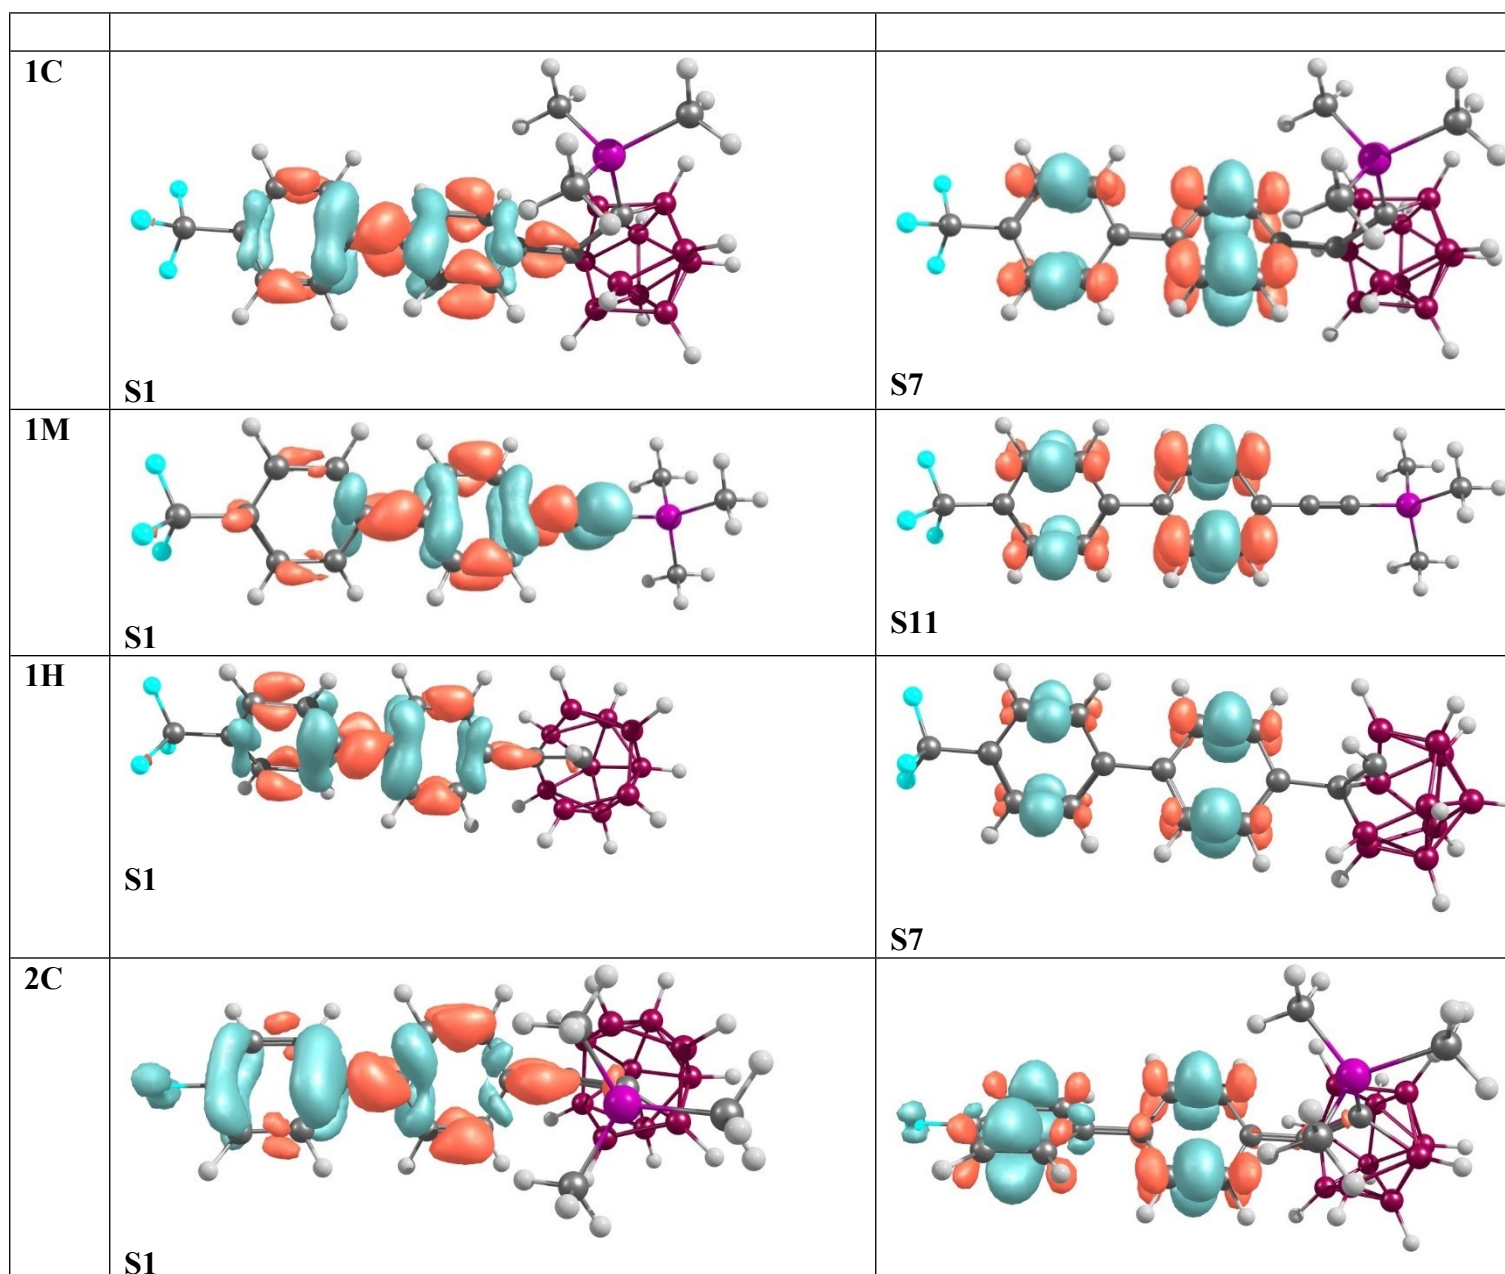

|    |                                                                                               |                                                                                                |
|----|-----------------------------------------------------------------------------------------------|------------------------------------------------------------------------------------------------|
|    |                                                                                               | S7                                                                                             |
|    | 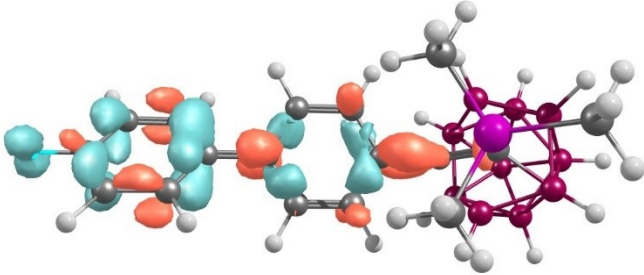 <p>S8</p>   |                                                                                                |
| 2M |  <p>S1</p>   |  <p>S11</p>  |
| 2H |  <p>S1</p>  |  <p>S7</p>  |
|    |  <p>S8</p> |                                                                                                |
| 3H |  <p>S1</p> |  <p>S7</p> |
| 3C |            |            |

|           |                                                                                     |                                                                                      |
|-----------|-------------------------------------------------------------------------------------|--------------------------------------------------------------------------------------|
|           | <b>S1</b>                                                                           | <b>S7</b>                                                                            |
|           | 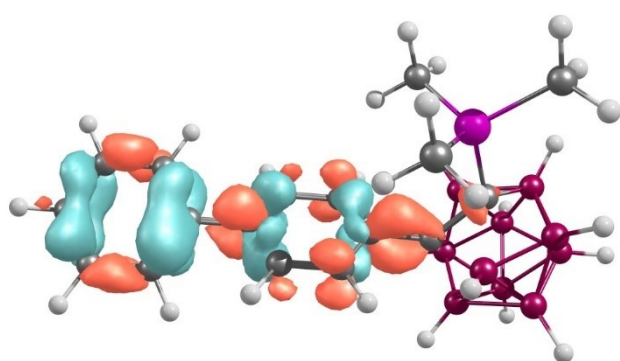   |                                                                                      |
|           | <b>S8</b>                                                                           |                                                                                      |
| <b>3M</b> |    |    |
|           | <b>S1</b>                                                                           | <b>S11</b>                                                                           |
|           |   |   |
|           | <b>S14</b>                                                                          | <b>S23</b>                                                                           |
| <b>4C</b> |  |  |
|           | <b>S1</b>                                                                           | <b>S7</b>                                                                            |
|           |  |                                                                                      |
|           | <b>S8</b>                                                                           |                                                                                      |
| <b>4M</b> |  |  |
|           | <b>1S</b>                                                                           | <b>S11</b>                                                                           |

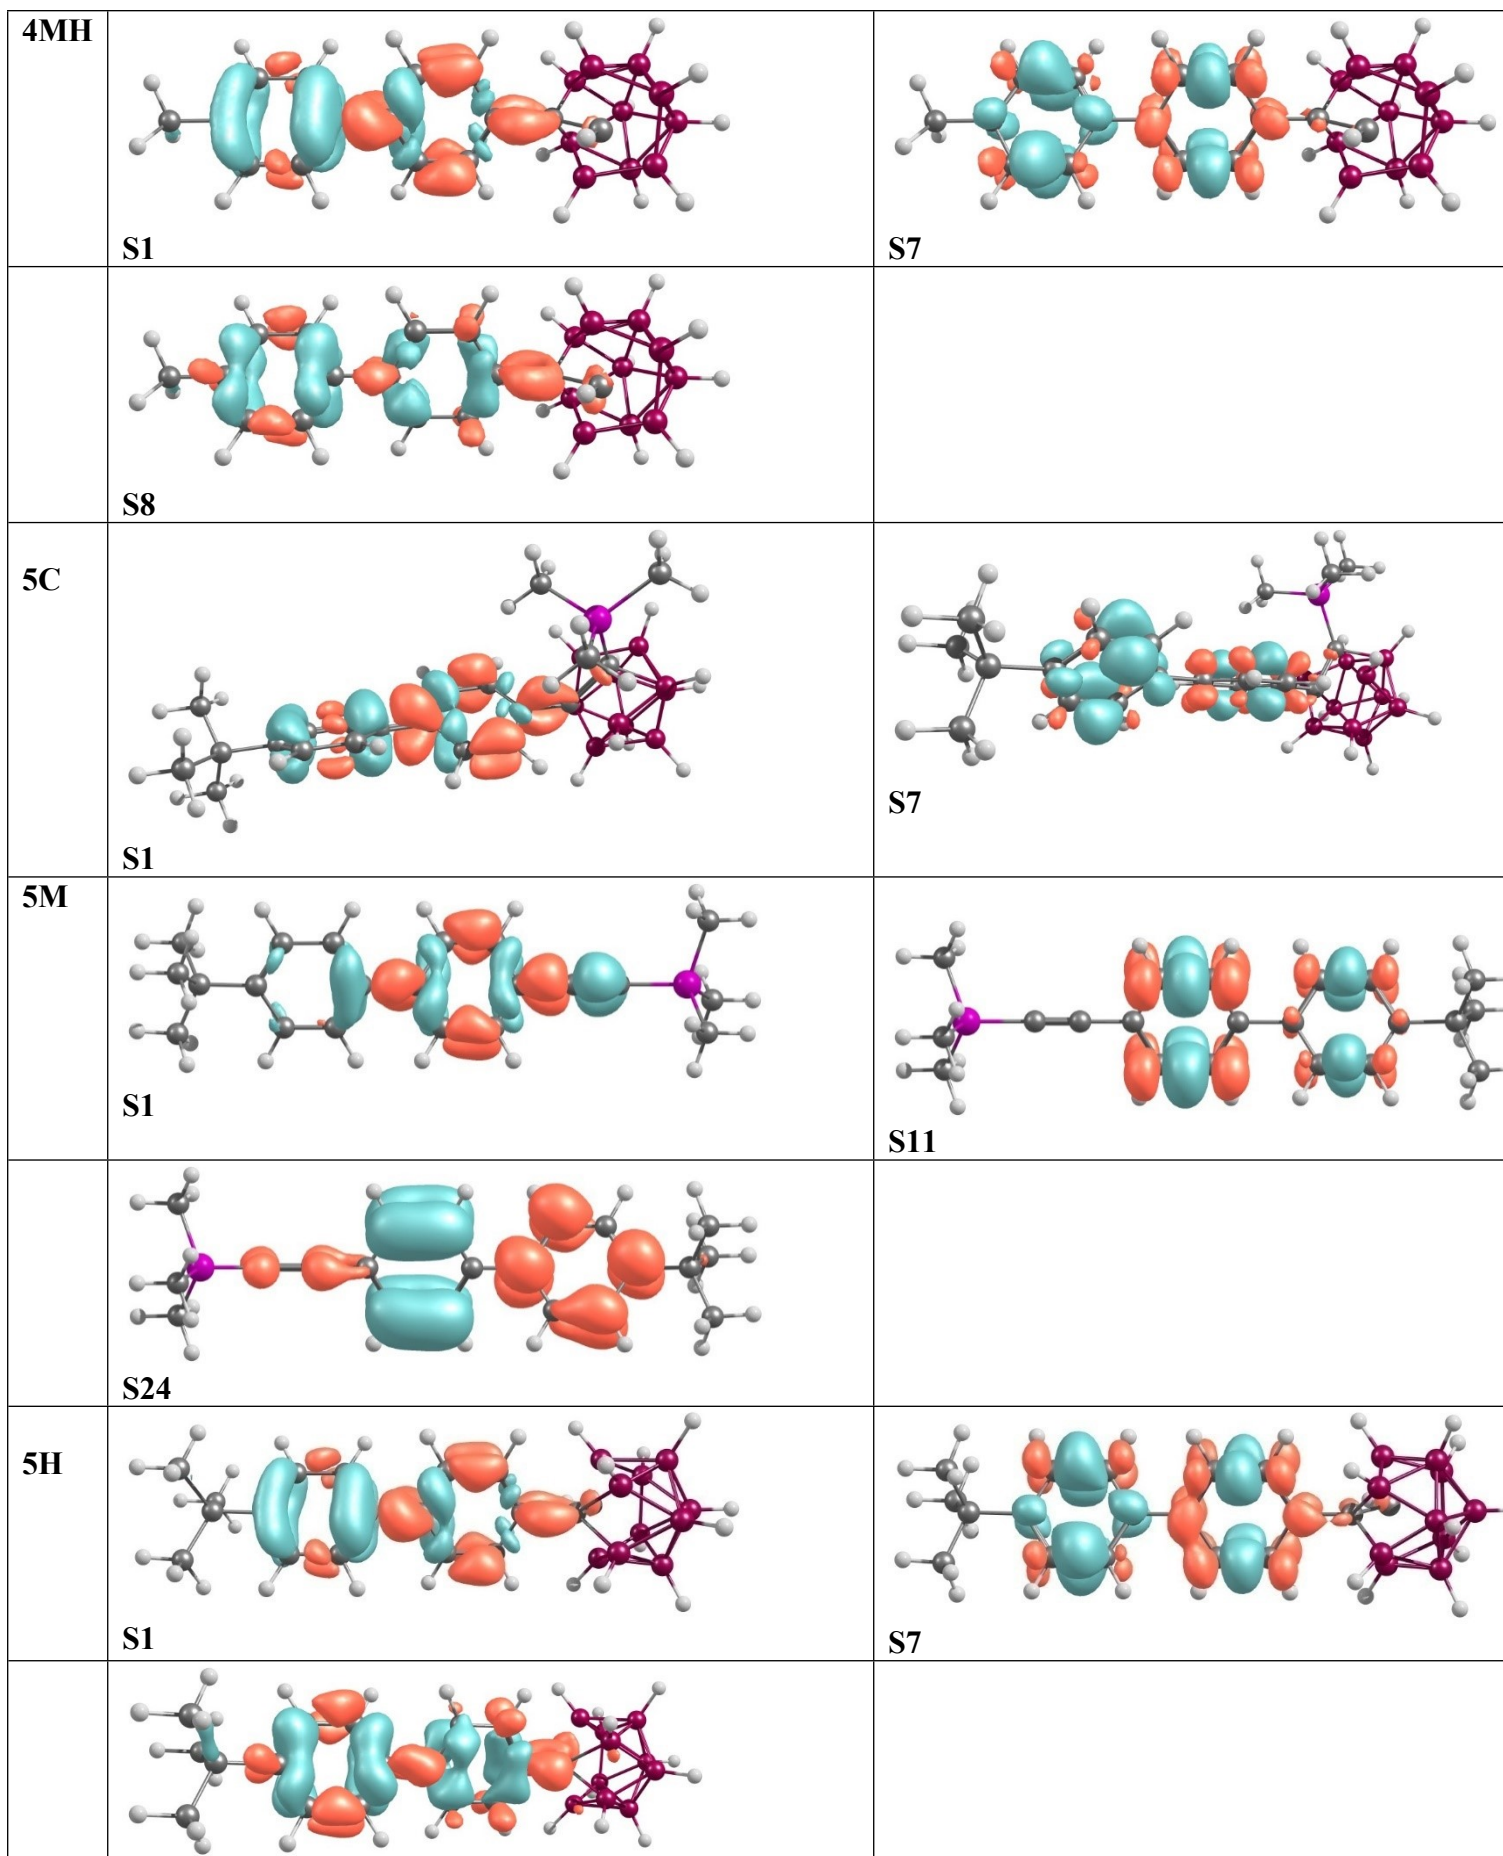

|    |                                                                                                                                                                                                                                                                                  |                                                                                                                                                                                                                                                        |
|----|----------------------------------------------------------------------------------------------------------------------------------------------------------------------------------------------------------------------------------------------------------------------------------|--------------------------------------------------------------------------------------------------------------------------------------------------------------------------------------------------------------------------------------------------------|
|    | S8                                                                                                                                                                                                                                                                               |                                                                                                                                                                                                                                                        |
| 6M | 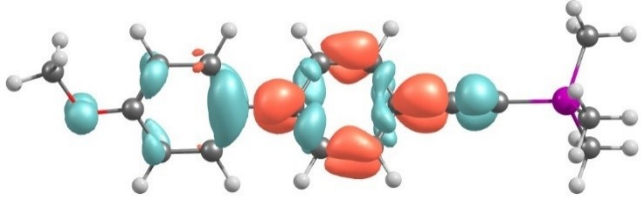 Molecular orbital visualization for state S1 of molecule 6M. The structure shows a chain of atoms with cyan and orange lobes representing the wavefunction. A purple atom is at the right end. |  Molecular orbital visualization for state S9 of molecule 6M. The structure shows a chain of atoms with cyan and orange lobes. A purple atom is at the right end.    |
|    | S1                                                                                                                                                                                                                                                                               | S9                                                                                                                                                                                                                                                     |
|    |  Molecular orbital visualization for state S21 of molecule 6M. The structure shows a chain of atoms with cyan and orange lobes. A purple atom is at the right end.                              |                                                                                                                                                                                                                                                        |
|    | S21                                                                                                                                                                                                                                                                              |                                                                                                                                                                                                                                                        |
| 6H |  Molecular orbital visualization for state S1 of molecule 6H. The structure shows a chain of atoms with cyan and orange lobes. A purple atom is at the right end.                              |  Molecular orbital visualization for state S8 of molecule 6H. The structure shows a chain of atoms with cyan and orange lobes. A purple atom is at the right end.    |
|    | S1                                                                                                                                                                                                                                                                               | S8                                                                                                                                                                                                                                                     |
| 6C |  Molecular orbital visualization for state S1 of molecule 6C. The structure shows a chain of atoms with cyan and orange lobes. A purple atom is at the right end.                             |  Molecular orbital visualization for state S9 of molecule 6C. The structure shows a chain of atoms with cyan and orange lobes. A purple atom is at the right end.  |
|    | S1                                                                                                                                                                                                                                                                               | S9                                                                                                                                                                                                                                                     |
| 7C |  Molecular orbital visualization for state S1 of molecule 7C. The structure shows a chain of atoms with cyan and orange lobes. A purple atom is at the right end.                             |  Molecular orbital visualization for state S9 of molecule 7C. The structure shows a chain of atoms with cyan and orange lobes. A purple atom is at the right end.  |
|    | S1                                                                                                                                                                                                                                                                               | S9                                                                                                                                                                                                                                                     |
| 7M |  Molecular orbital visualization for state S1 of molecule 7M. The structure shows a chain of atoms with cyan and orange lobes. A purple atom is at the right end.                             |  Molecular orbital visualization for state S11 of molecule 7M. The structure shows a chain of atoms with cyan and orange lobes. A purple atom is at the right end. |
|    | S1                                                                                                                                                                                                                                                                               | S11                                                                                                                                                                                                                                                    |

|           |                                                                                     |                                                                                      |
|-----------|-------------------------------------------------------------------------------------|--------------------------------------------------------------------------------------|
|           | 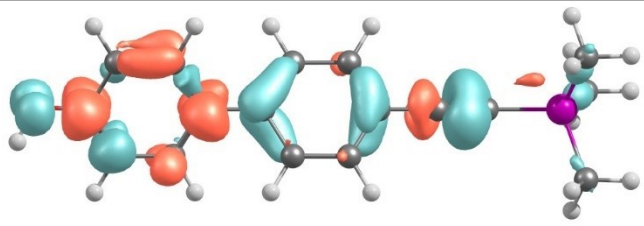   |                                                                                      |
| <b>7H</b> |    |    |
|           |    |    |
| <b>8C</b> |  |  |
| <b>8M</b> |  |  |
|           |  |                                                                                      |

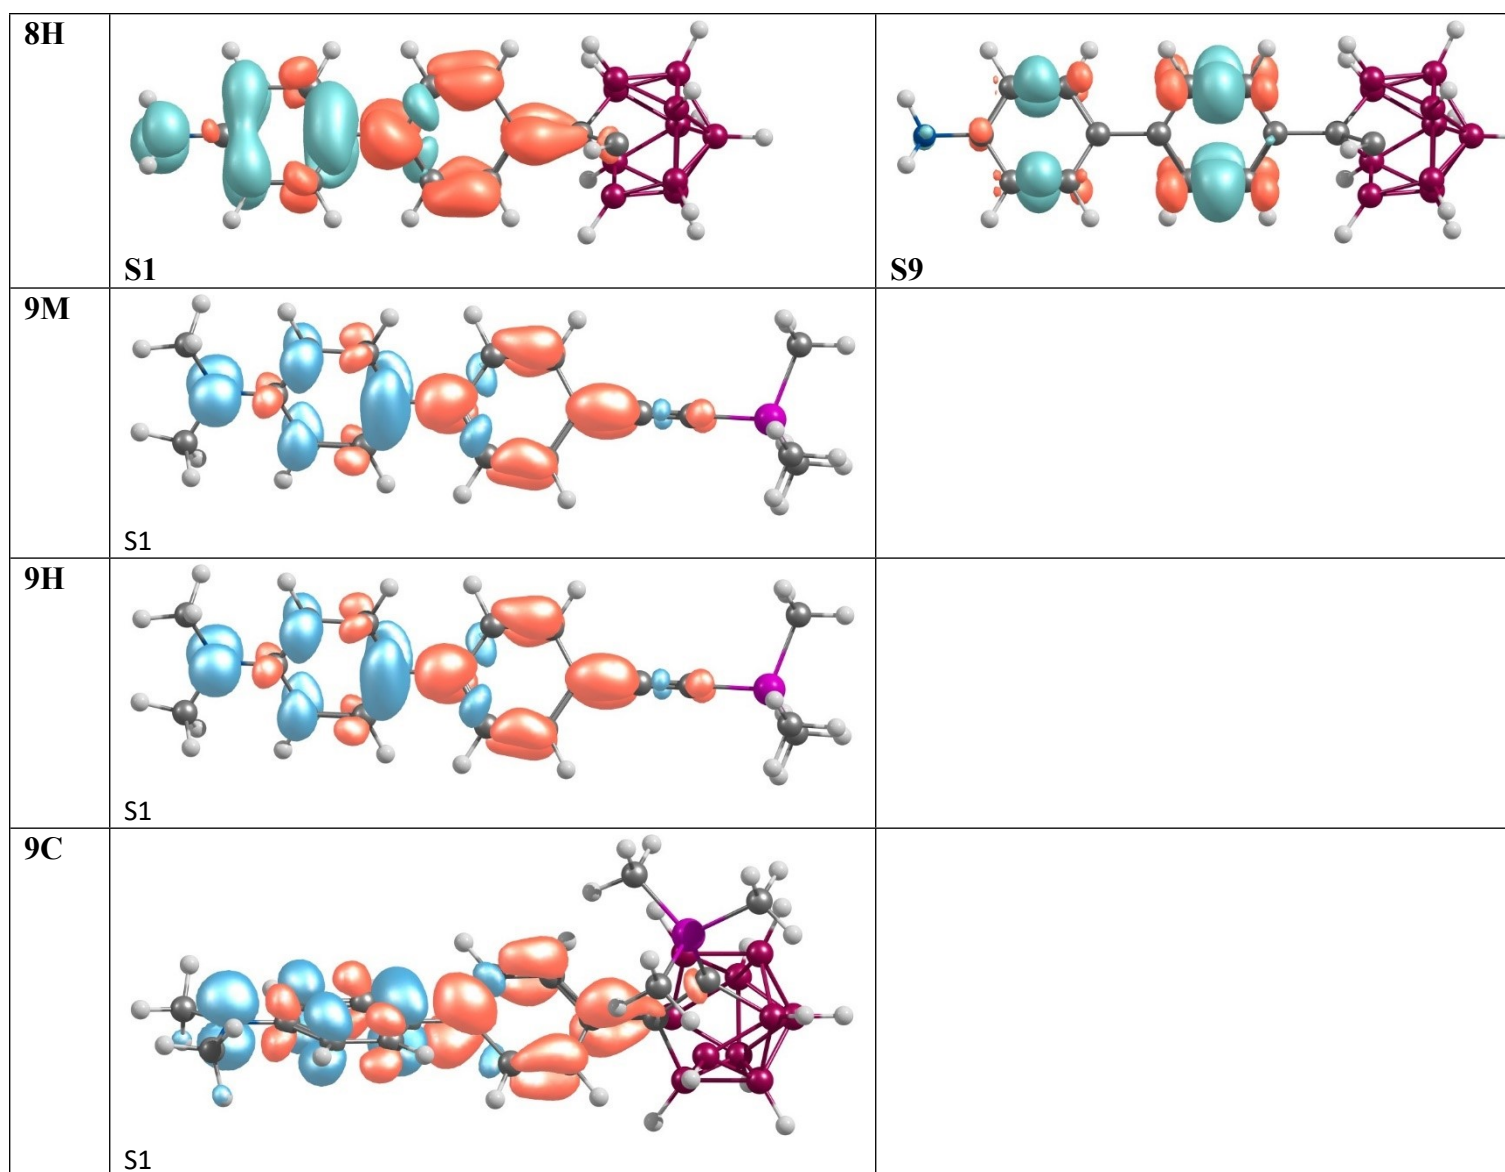

**Figure S2.**CDD for different excited states of the title compounds. CDD was calculated as a difference between the corresponding excited state and the ground state of the considered system using the CAM-B3LYP/6-31G(d,p)/IEFPCM level of theory. Blue regions indicate negative electron density, whereas orange regions correspond to positive electron density. The isosurface level is set to be 0.001807.

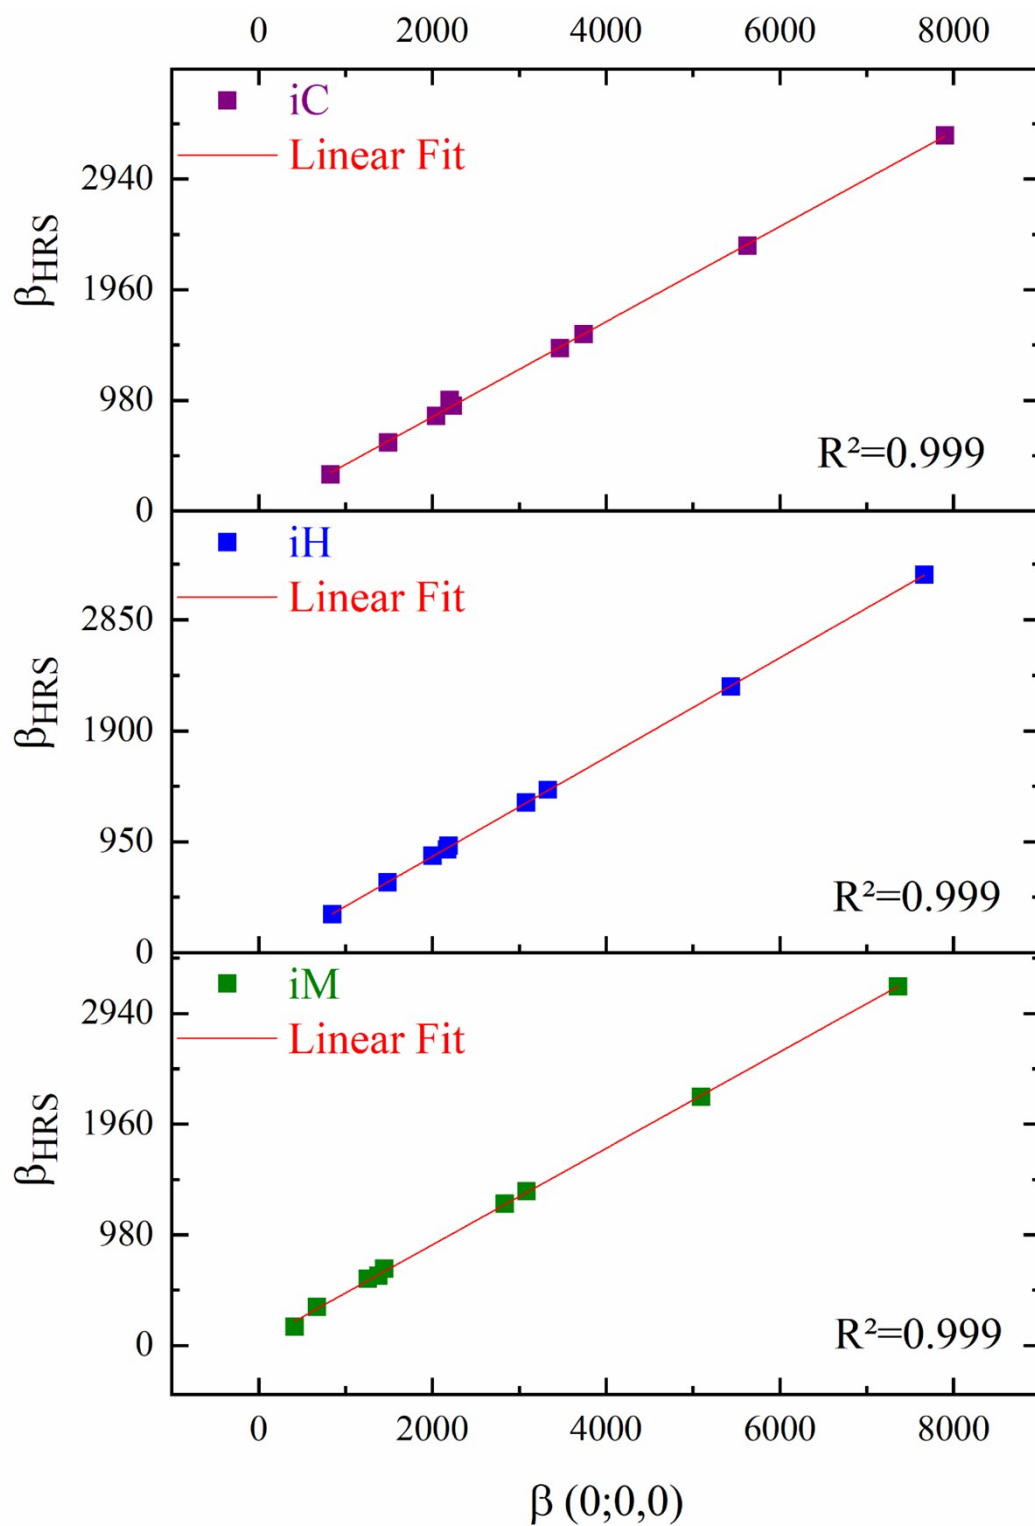

**Figure S3.** Correlation between static first hyperpolarizability  $\beta_{HRS}$  and  $\beta(0;0,0)$  for iM, iH and iC compounds ( $i=1$  to 9), calculated at the CAM-B3LYP/6-31G(d,p)/IEFPCM level in THF.

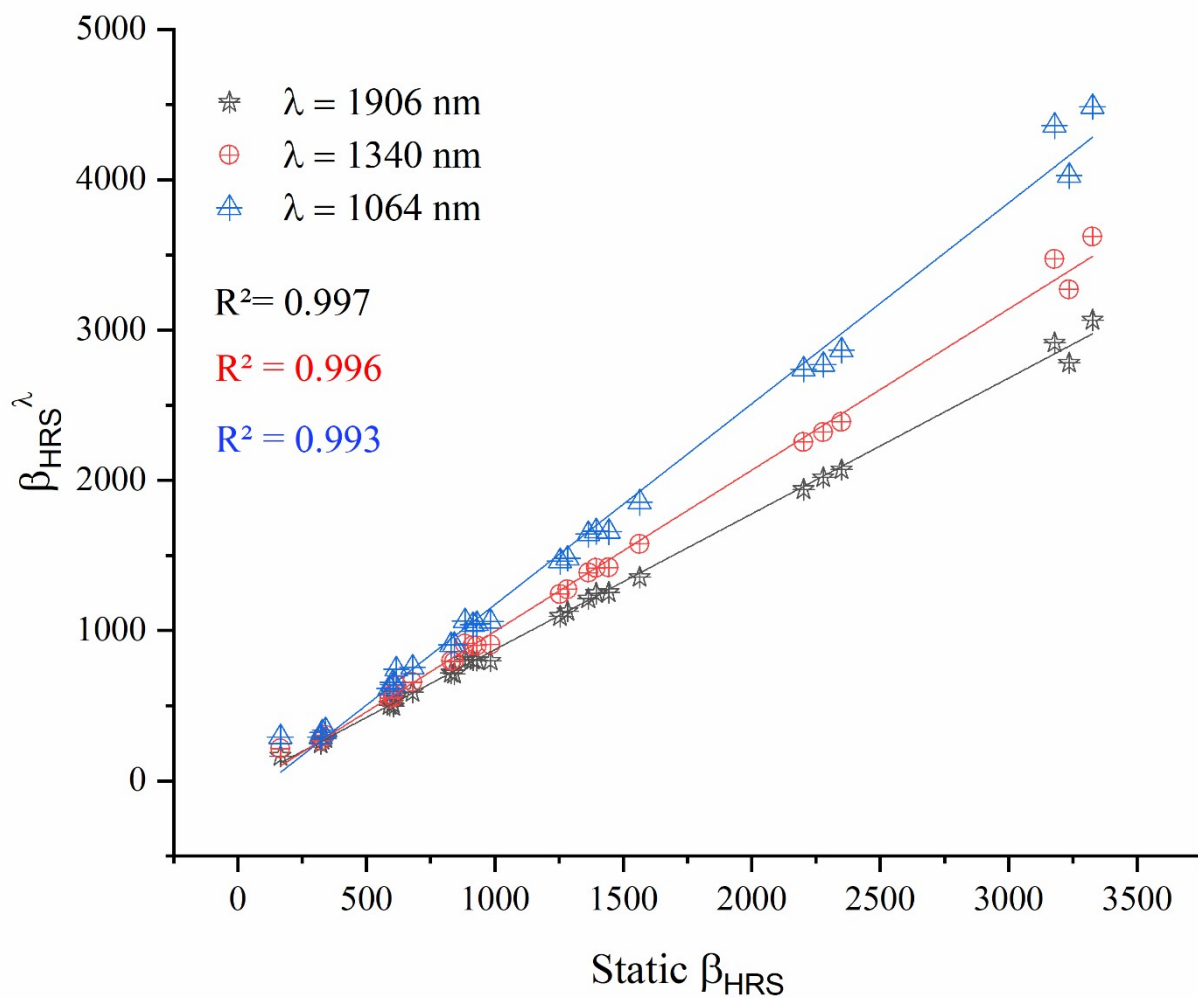

**Figure S4.** Correlation between dynamic and static First Hyperpolarizability  $\beta_{HRS}$  for iM, iH and iC compounds (i=1 to 9), calculated at the CAM-B3LYP/6-31G(d,p)/IEFPCM level in THF.

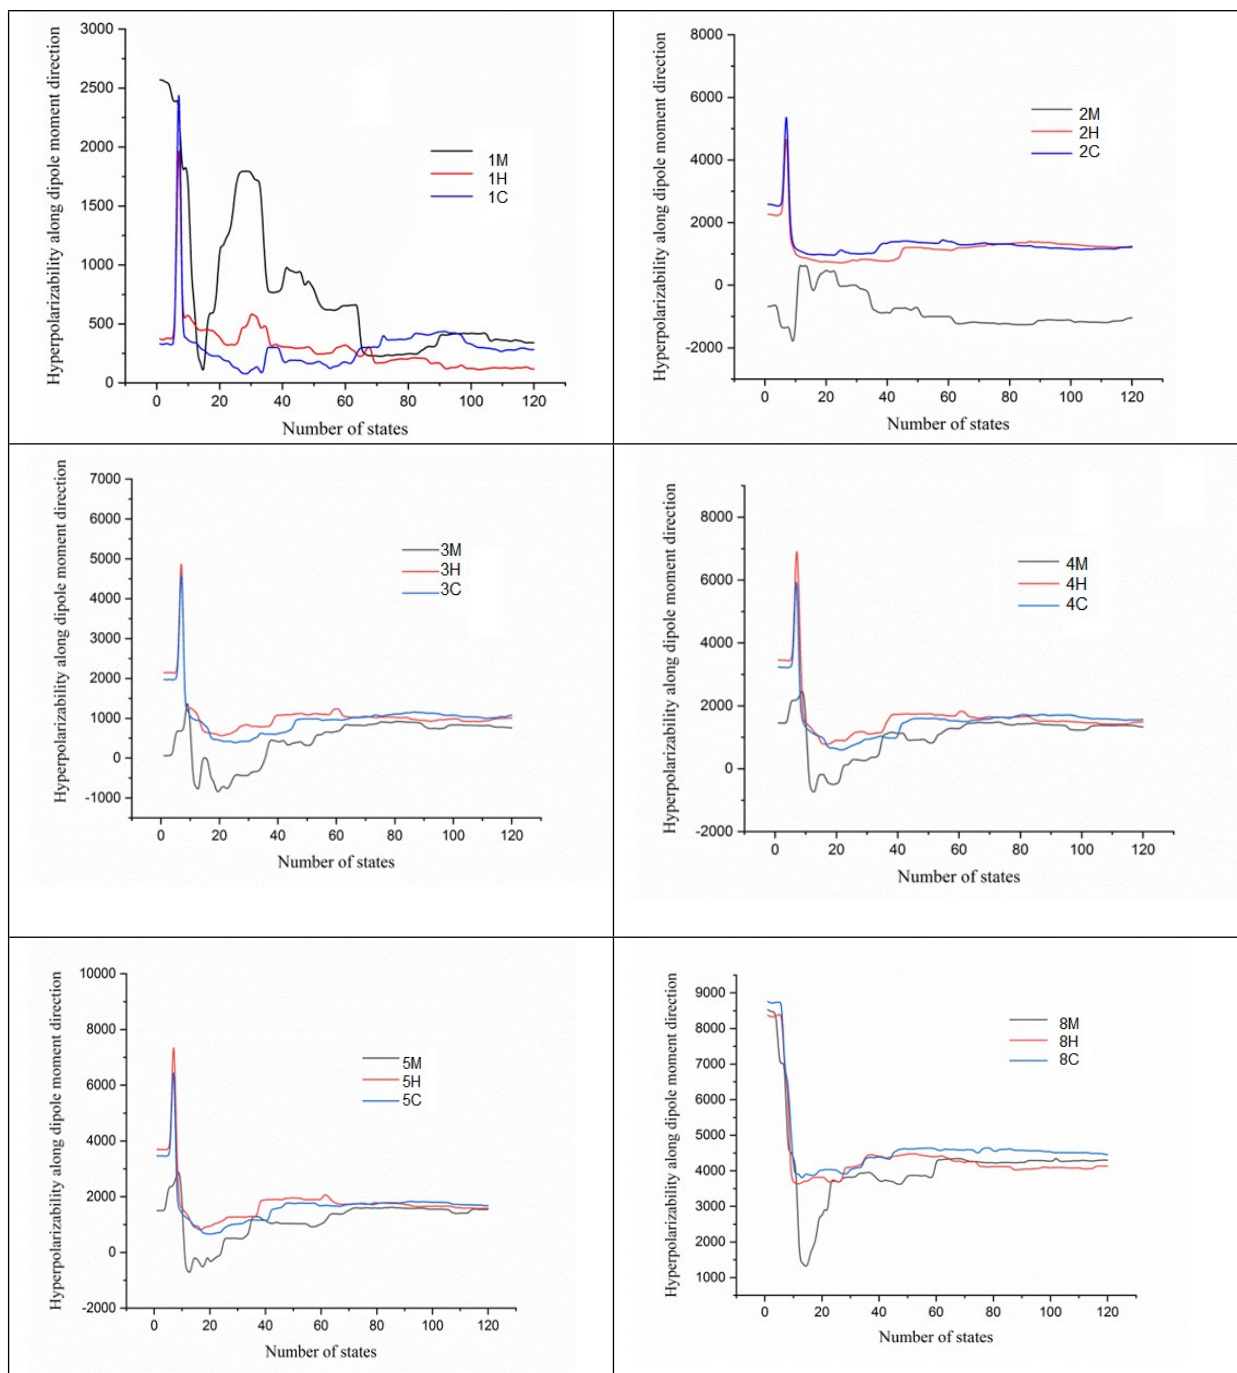

**Figure S5.** Plots of static first hyperpolarizability values as computed in the SOS formalism as a function of the number of excited states for *for*<sub>i</sub>M, *i*H and *i*C compounds (*i*=1-5,8), calculated at the CAM-B3LYP/6-31G(d,p)/IEFPCM level in THF.

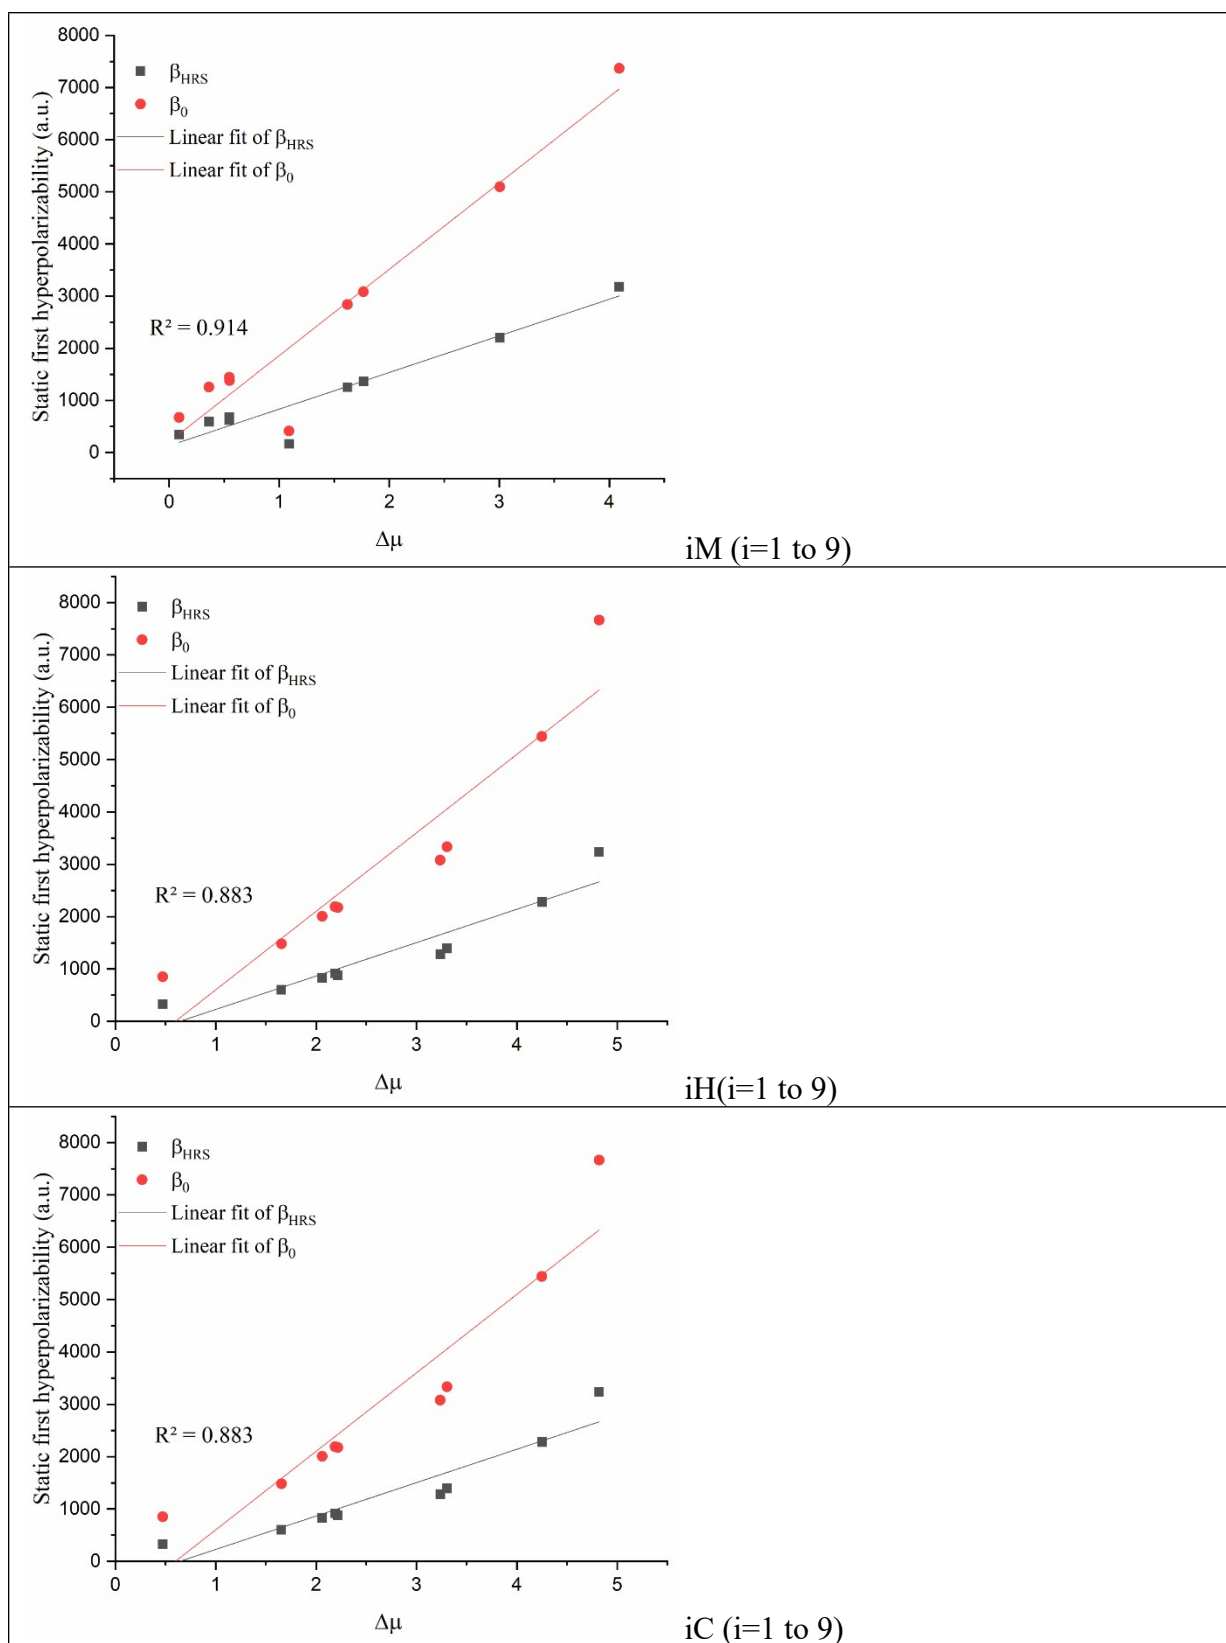

**Figure S6.** Linear Correlation Between First Hyperpolarizability and Dipole Moment Variation ( $\Delta\mu$ ) in the First Excited State for iM, iH and iC (i=1 to 9) compounds

## References

- (1) You, D. K.; Kim, M.; Kim, D.; Kim, N.; Lee, K. M. Improvement in Radiative Efficiency Via Intramolecular Charge Transfer in Ortho-Carboranyl Luminophores Modified with Functionalized Biphenyls. *Inorg. Chem.* **2023**, *62*, 10003–10013. <https://doi.org/10.1021/acs.inorgchem.3c01242>.
